# **The clinical, humanistic, and economic outcomes, including experiencing of patient safety events, associated with admitting patients to single rooms compared with shared accommodation for acute hospital admissions. A narrative synthesis systematic literature review.**

## **Authors**

Andrea Bertuzzi,<sup>2</sup> Alison Martin (0000-0003-4660-278X),<sup>2</sup> Nicola Clarke,<sup>2</sup> Cassandra Springate (0000-0003-1846-6901),<sup>2</sup> Rachel Ashton (0000-0003-1755-7975),<sup>3</sup> Wayne Smith (0000-0002-4297-1978),<sup>3</sup> Andi Orłowski (0000-0002-1463-9206),<sup>3</sup> Duncan McPherson (0000-0002-2560-8552)<sup>1</sup>

<sup>1</sup>New Hospital Programme, NHS England and Improvement, Skipton House, 80 London Road, London SE1 6LH, UK

<sup>2</sup>Crystallise Ltd, 17 High Street, Stanford le Hope, Essex SS17 0HD, UK

<sup>3</sup>The Health Economics Unit, NHS Midlands and Lancashire Commissioning Support Unit, Heron House, 120 Grove Road, Stoke on Trent ST4 4LX, UK

Correspondence to: Dr Duncan McPherson, NHS England and Improvement, Skipton House, 80 London Road, London, SE1 6LH. [duncan.mcpherson1@nhs.net](mailto:duncan.mcpherson1@nhs.net).

Word count, excluding title page, abstract, references, figures and tables 7221

## Summary

### What is already known on this topic

- The effects of single rooms versus shared accommodation on hospital inpatients' outcomes are not well understood
- Many studies are qualitative or narrative because randomised controlled trials are not practical and most comparative studies have only become possible after relocation to new facilities
- This systematic review investigated the potential range of impacts that inpatient single rooms and shared accommodation have on the health-care processes, outcomes, and costs

### What this study adds

- The evidence, though extensive, revealed no clear advantage for one type of inpatient hospital accommodation for many of the areas assessed.
- There was weak evidence indicating advantages for single bedrooms in some areas, such as lower risk of hospital acquired infection in adult intensive care and a range of outcomes in neonatal intensive care.
- Most patients preferred single rooms for privacy and some preferred shared accommodation for avoiding loneliness.

## Abstract

**Objectives:** Assess the impact of single rooms versus multioccupancy accommodation on inpatient health-care outcomes and processes.

**Design:** Systematic review.

**Setting:** Hospitals and secondary care units.

**Participants:** Inpatients receiving routine, emergency, high-dependency, or intensive care with a named type of hospital accommodation.

**Main outcome measures:** Qualitative synthesis of findings.

**Results:** Of 4,861 citations initially identified, 215 were deemed suitable for full-text review, of which 145 were judged to be relevant to this review. Five main method types were reported: 60 before-and-after comparisons, 75 contemporaneous comparisons, 18 qualitative studies of accommodation preferences, 10 evidence syntheses. All studies had methodological issues that potentially biased the results by not adjusting for confounding factors that are likely to have contributed to the outcomes. Ninety-two papers compared clinical outcomes for patients in single rooms versus shared accommodation, but no clearly consistent conclusions could be drawn about overall benefits of single rooms versus shared accommodation (multioccupancy rooms, bays, or wards). Single rooms were most likely to be associated with a small overall clinical benefit for the most severely ill patients, especially neonates in intensive care. Patients who preferred single rooms tended to do so for privacy, and for reduced disturbances. By contrast, men, older adults, children, and adolescents were more likely to prefer shared accommodation to avoid loneliness. While shared accommodation seemed to be the most cost-effective approach for construction, greater costs associated with building single rooms were small and likely to be recouped over time by other efficiencies.

**Conclusions:** The lack of difference between inpatient accommodation types in a large number of studies suggests that there would be little effect on clinical outcomes, particularly in routine care. Patients in intensive care areas are most likely to benefit from single rooms. Most patients preferred single rooms for privacy and some preferred shared accommodation for avoiding loneliness.

## Keywords

hospital design; hospital construction; hospital management; hospital administration; health care facility environment; single room; single accommodation; single bedroom; multiple bedroom; single bedroom; multiple bedroom; multiple accommodation; multiple beds

## INTRODUCTION

The UK government announced that 40 new hospitals will be delivered in England by 2030.(1) The majority will be acute secondary care hospitals. One decision is whether beds should be in a single or multioccupancy room. Once each hospital is built it is difficult to change the proportion of single rooms to shared accommodation. It is important to get this right at the start. Many views have been expressed on the correct proportion of single rooms in a hospital in England. NHS England's National Medical Director, Stephen Powis, believes in "...single rooms being the default...".(2) In response David Oliver wrote that, "... our goal [should] perhaps be a greater proportion of single rooms, rather than these exclusively".(3) The topic has been debated in the British Medical Journal.(4) There is a need for a systematic analysis of the evidence on what is most likely to yield the best outcome for patients..

For some situations isolation of the patient in a single room is part of the clinical intervention. For example, a patient with severe immune compromise may be isolated to protect them from acquiring infection. Similarly, patients with highly transmissible infections may be isolated to prevent spread of infection. A single room is also used where privacy is extremely important, for example delivery units on maternity wards or for dying patients and their families. For most patients, accommodation in either a single or multioccupancy room is possible and may have a range of balanced risks and benefits. Patients may have a range of reasons for their preference including what would count as a good experience of hospital admission. However, there is no settled, obvious evidence base to illustrate what type of accommodation is best for overall patient outcomes or patient experience.

This study set out to find published evidence to investigate whether inpatient stays in single rooms or in shared accommodation (i.e., multioccupancy rooms, bays, or wards), have been associated with any impact on the processes undertaken by the hospital and on patients' outcomes. A wide range of clinical, social, and economic outcomes were included from the primary perspective of patients across a range of acute hospital types. Staff perspectives, while not formally assessed, were included if reported as part of a study on patient and caregiver views. The objective was to compare staying in a single room versus shared accommodation for care in which the type of accommodation was not part of the intervention itself. This systematic review protocol has been registered with PROSPERO, registration number CRD42022311689. Ethics approval was not required for this study.

## METHODS

### Identification of papers

We performed a systematic literature review of content in Medline (via PubMed) and Embase for comparative clinical trials, observational studies, and systematic literature reviews published in any language up to 17 February 2022. Additional searches were performed via Google Scholar and the National Institute for Health and Care Excellence. We used combinations of "hospital", "design", "management", "health care facility", "single", "multi", "room", "bay", "bed", and "accommodation", optimised for the search platform (see supplementary information – Appendix: Search Strategy). Eligible papers addressed care of adult and/or paediatric inpatients staying in hospital for routine, emergency, or intensive care and who were assigned to a particular accommodation type (single room or shared accommodation). We excluded papers that assessed long-stay patients, day patients, and those attending accident and emergency departments who were not later admitted to an acute hospital; patients who were relocated to a single room during admission (e.g., for isolation after contracting and infectious disease or for terminal care); no direct comparison condition for staying in a single room; non-clinical outcomes; and impact of care on

health-care professionals and/or support staff. We also excluded narrative reviews, perspective papers, letters, editorials, and conference abstracts with no relevant data.

Retrieved abstracts were screened by two researchers (AB and NC) using the inclusion criteria in the appendix. Disagreements were resolved by discussion with the project leader. Shortlisted papers were retrieved as full texts. The reference lists of all papers included in this analysis were reviewed to identify any additional publications of primary research that met the inclusion criteria. Full papers were screened for relevance by two researchers (AB and AM) independently.

The quality of each paper was assessed by the same researcher using the Downs and Black checklist for observational studies(5) and the Joanna Briggs Institute checklists (<https://jbi.global/critical-appraisal-tools>) for qualitative studies and for systematic reviews. These checklists enable assessment of reporting quality, generalisability of findings, biases in measurements of intervention and outcome, confounding in the selection of participants, and power (whether negative findings could be the result of chance). Each quality assessment checklist score was converted to a percentage of the maximum possible score and were categorised for the purposes of this report into high (75–100%), moderate (50–74%), or low quality (<50%; see supplementary table 1).

## Data extraction and synthesis

Data were extracted into an Excel spreadsheet and checked, with final adjudication by the project leader (AM), and were synthesised narratively, according to the methods of Campbell et al.(6) The fields for extraction were study methodology, baseline characteristics of participants (when provided), clinical outcomes, non-clinical outcomes, resource use, and costs. The clinical outcomes of interest were in-hospital mortality, overall mortality ( $\geq 30$  days), morbidity (e.g., falls, deterioration, new pressure ulcers, and complications), patient safety incidents, and hospital-acquired infections. Non-clinical outcomes of interest were patient and family member experiences, length of stay, cost of stay, experience of accommodation change and number of changes (for the same type of care) during admission, and impact on the caregivers and family members of dependent patients. Outcomes were assessed based on the measures used in the original articles. Extracted data were sorted by outcome and then by population and setting. Relevant data for each outcome were summarised narratively by comparing heterogeneity across studies in terms of whether differences were statistically significant and in favour of single room or shared accommodation.

## Statistical analysis

As substantial heterogeneity across studies (e.g., how data were reported, study methods, etc) was expected, formal meta-analysis was not deemed feasible. Thus, no formal measures of heterogeneity or overall effect size were performed, and all data reported are descriptive. To aid comparison and assess consistency of the conclusions, data are presented in summary tables.

Certainty of findings was assessed based on whether the direction of benefit was consistently statistically significant for single rooms or shared accommodation (across all studies or those with the lowest risk of bias) or was inconsistent or not statistically significant.

There are special areas of hospitals where responses to the intervention might differ, such as intensive-care or paediatric units and areas for women in labour. Therefore, we aimed to present data separately by different subgroups.

## Patient and Public Involvement

Patients and the public were not involved in designing this study. The study aim was to establish what is already published in peer reviewed literature on the topic, including the views of patients, their parents or caregivers, and the public.

## RESULTS

### Study characteristics

The initial searches returned 4,861 potentially relevant abstracts. After screening and removal of duplicates, 145 publications were included in this review (Figure 1). There were six main types of studies: 60 before-and-after comparisons (shared accommodation followed by relocation to single-rooms); 75 comparisons of patients allocated to single rooms compared with others simultaneously in shared accommodation; 18 qualitative studies recording the views of patients, caregivers, or healthcare professionals on accommodation preferences; 10 evidence syntheses, including systematic literature reviews, guidelines and other reports; and three economic evaluations of accommodation type (Figure 2). Some studies incorporated more than one design.

All studies had methodological issues that potentially biased the results by not adjusting for confounding factors that are likely to have contributed to the outcomes. In the 60 before-and-after trials, many factors other than accommodation changed due to moving into new facilities, such as unfamiliarity with new layouts and logistics. In the 75 contemporaneous comparisons, reasons for bed space allocations were not generally reported (e.g., availability, severity of illness), making their effects on the differences in outcomes unclear. Nine studies did not report baseline characteristics, and of those that did, only three reported no significant difference between age, sex, and comorbidity or health status of patients at baseline.

The quality of studies varied widely. Thirty-four studies were assigned high quality scores (75–100%) with a range of 78–100% (see supplementary table 1). Twenty-three studies were classified as being of low quality (<50%) with a range of 10–48%.

### Mortality

Eighteen studies reported mortality (see Figure 3 and supplementary Table 2). (7–24) Ten were before-and-after studies and the others were contemporary studies. Only one article scored less than 50% for quality and two had high quality scores. Six studies involved neonates/infants, one assessed children, and the remainder were concerned with adult/elderly care. The numbers of deaths were low, meaning that the studies might not have had enough patient-years of follow-up to detect small but statistically significant differences in mortality. Likewise, whether reported increases in mortality reflected true increases in risk or were due to confounding factors (e.g., unreported reasons for patients being allocated single rooms) is unclear.

### Routine care

Four studies involved patients receiving routine care, (7,8,16,22), all in adults, none of which found a significant difference in mortality between those in single rooms versus shared accommodation, including up to 1 year after discharge.

## Intensive care

Six studies assessed mortality among adults in ICUs.(12,13,17,18,20,24) One study by Bracco and colleagues(17) favoured single rooms. That study included 2,522 adults in ICUs in Canada and reported mortality of 2.9% among those in single rooms or cubicles compared with 8.3% among those in shared accommodation ( $p<0.001$ ). A study of 666 adults in ICUs in Korea with COVID-19 favoured shared accommodation, reporting 2.4% mortality versus 4.6% among those treated in single rooms but no statistical analysis of the difference was reported.(20) The other studies showed no differences between accommodation types.

Seven studies assessed mortality specifically among neonates in ICU.(9–11,15,19,21,23) Three favoured single rooms. Lehtonen et al.(23) assessed 4,662 neonates in 331 neonatal ICUs (NICUs) across 10 countries (Canada, Australia, New Zealand, Finland, Israel, Japan, Spain, Sweden, Switzerland, Italy) and found that those cared for in units with single rooms had lower odds of death or any major morbidity than those in units with no such facilities (adjusted odds ratio 0.76; 95% CI 0.64–0.89). Two papers reported reduced mortality in single rooms among a small population of neonates in intensive care, but statistical significance was not reported.(9,10) By contrast, two studies favoured shared accommodation. Puumala and colleagues(15) reported a lower percentage of deaths among 9,995 neonates. Harris et al.(19,25) assessed NICUs in 11 hospitals in the USA and found fewer deaths among neonates nursed in units with shared accommodation compared with units with single rooms. However, statistical significance was not reported in either.

Lazar et al(14) was the only study to assess children in a paediatric ICU and found no difference between accommodations types.

## Patient care and disease management

Twelve publications reported on outcomes related to patient care and disease management (see Figure 3 and supplementary Table 3).(26,8,27–36) All were in adults or non-specified age groups. Three were before-and-after studies, four were contemporaneous studies, and five were evidence syntheses. Four studies had quality scores below 50% but four had scores greater than 75%. All papers assessed routine care.

Most findings favoured single rooms. Significance was shown for improvements in cleanliness,(30) pain management(30), and interactions between patients and medical staff,(31) and other findings were descriptive. A study in Australia of 1,569 orthopaedic patients had fewer emergency calls due to deterioration in condition after a move to single rooms compared with patients in shared accommodation.(8) As room allocation was based partly on severity of illness, nurses tended to position themselves nearer higher-risk patients to aid visualisation. Lawson and Phiri(27) found better patient satisfaction with care and lower analgesic use in orthopaedic patients in single rooms.

Three systematic reviews found that patients in single rooms may have faster recovery due to better sleep and a more pleasant environment,(33) but there was no consistent effect on use of medication.(35) An OECD WHO report concluded that single-room occupancy was associated with reduced pain scores, but due to a lack of detail had a very low quality score (14%).(37)

Findings in favour of shared accommodation were feelings of safety(28) and less use of restraints.(34) In a comparison of only single rooms after a move to a new hospital with only shared accommodation in the previous hospital, falls and medication errors in the medical assessment unit

increased notably immediately but by 9 months had fallen to levels lower than previously.(26) However, in the single-room ward for older adults, falls and pressure ulcers significantly increased after the move and remained higher than before moving. No similar trends were seen after the move in a control hospital with 50% single rooms and 50% shared accommodation, and this was the preferred choice of nurses before and after the move (38% and 40%, respectively).

## **Maternity and neonatal care**

Twenty-three studies were found that assessed maternity and neonatal care (see Figure 3 and supplementary Table 4).(10,11,15,38–57) Most (n=14) were before-and after studies and the remainder were contemporaneous studies. Three studies were low quality and only one had a high-quality score. Many of these studies included statistically assessed findings, with most favouring single rooms or showing no difference between accommodation types.

### **Maternity care**

Nine studies considered maternity care and perceptions of mothers and family members.(39,40,42,44,45,47,48,50,51)

Harris and colleagues(41) assessed 976 low-risk patients, 583 of whom received all care in single rooms and 393 in separate labour, delivery, and recovery areas. While overall use of intrapartum interventions was similar, maternal outcomes were better in single rooms. After discharge, Erdevi et al(48) reported that mothers of babies in NICUs who received care in shared accommodation had significantly more acute care visits ( $p=0.046$ ), telephone consultations ( $p=0.01$ ), and rehospitalizations ( $p<0.05$ ) than those cared for in single rooms, and the reasons were more likely to be for issues related to prematurity like feeding difficulties compared with anatomical disorders. This perception is supported by the findings of Janssen et al,(42) which showed that mother in single rooms rated information and instructions at discharge as being clearer than those in shared accommodation.

Multiple studies indicated that satisfaction with care teams was greater in single rooms, including duration and quality of interactions and needs met.(39,40,42–45,47) In one study participants felt that parental presence was greater in single rooms than in shared accommodation.(50) In a US study, women reported less pain in single rooms than in shared accommodation.(43)

### **Neonatal care**

Fourteen papers reported on outcomes in neonatal care.(10,15,38,41–43,46,49,52–57) Many of the results for neonates in ICUs showed no differences in outcomes between accommodation types. Significant improvements were seen in breastfeeding outcomes(10,15,55,58) and weight gain(46,58) in favour of single rooms. However, Tandberg et al(49) reported that longer-term weight gain (4 months) was better after neonatal care in shared accommodation. In two studies, reduced apnoea events were associated with single rooms,(10,59) and in another study less need for mechanical ventilation was reported in single rooms.(55) Significantly reduced neonatal pain scores were also reported.(43)



## Complications of disease

Twenty-three articles assessed disease complications (see Figure 3 and supplementary Table 5). (7,8,16–18,22–24,26,34,37,41,43,48,54,56,60–64) Nine were before-and-after studies, 10 were contemporaneous studies, one used a mix of study designs, and three were evidence syntheses. Two articles had quality scores below 50% and two had scores greater than 75%. Findings generally favoured single rooms or showed no differences between accommodation types.

## Routine care

Eight papers assessed complications specifically in routine care and all assessed care of adults. (7,10,16,22,41,63–65) Only one study reported results with significance assessed, which showed reduced incidence of delirium among older adults with dementia nursed in single rooms (hazard ratio 0.66, 95% CI 0.48–0.93,  $p < 0.02$ ). (65) The Scottish guidelines on delirium recommend reducing light and noise and having familiar items around patients with or at risk of developing delirium, (64) which might be supported by this finding.

In a small relocation study ( $n=64$ ) (26) pressure injuries seemed to be increased around tenfold in single rooms and falls in 50% or 100% shared accommodation, but a substantial change in case mix made this finding difficult to interpret. By contrast, in a larger non-controlled UK relocation study ( $n=1,569$ ), no significant difference was noted between different types of accommodation.

The findings for other complications, such as hip fracture rates following falls, thromboembolic events, infections, and other medical complications were not significantly different among orthopaedic patients in single rooms compared with those in shared accommodation in an Australian study. (42) Patients in single rooms were more likely to be female and much more likely to have private health insurance, which may have biased the outcomes.

## Intensive care

Twelve papers specified assessments in ICU settings, of which three assessed adults (17,18,24) and nine concerned neonatal care. (23,43,48,54,56,60,60–62) In one study of 1,253 adults in Brazil, (18) delirium was significantly less likely among those in ICU single rooms than in shared accommodation, but no significant difference was seen between groups of elderly patients in different types of ICU accommodation in the Netherlands. (24) Organ failure was reported to be significantly lower in patients managed in single rooms in one study. (17) However, few data are available in adults and most studies reported no differences between accommodation types.

An international study of 4,662 preterm neonates found a significantly lower risk of death or any major morbidity, including sepsis and retinopathy of prematurity, among those nursed in NICUs with single family rooms (odds ratio 0.76, 95% CI 0.64–0.89). (23) In contrast, another study showed lower rates of necrotising enterocolitis and intraventricular haemorrhage in shared accommodation. (46) However, in other studies, rates of these and other serious complications were similar in all ward types. (46,56,59,60) Lester et al (60) found that neonatal stress levels were reduced among babies in NICU single maternity care rooms compared with those in shared accommodation.

## Prevention of infection

Fifty-one studies discussed prevention of infection (see Figure 3 and supplementary Table 6). (8,10,11,13–15,17–19,21,26,34–36,46,49,53,56,61,66–98) Twenty were before-and-after studies, 28 were contemporaneous studies, one used a mix of study designs, and three were evidence syntheses. Seven had low quality scores and nine had high quality scores. More than half (n=33) studies reported statistically analysed data.

## Routine care

Routine care was assessed in adults in 10 studies (8,69,75,77,79,80,84,87,89,93) and eight involved mixed age populations and care levels that stated or were assumed to include adults and routine care. (26,35,36,67,71,72,88,95) Hospital-acquired infection rates were shown to be reduced in single rooms in six studies. (26,36,67,69,71,87,88) However, in Maben et al, (26) this finding depended on the ward mix: *Clostridium difficile* infections were reduced in single rooms where the split with shared accommodation was half and half, whereas all shared accommodation performed better than all single rooms. In Darley et al (67) this finding was only for *C difficile*, whereas hospital-acquired MRSA rates did not differ by accommodation type. Bocquet et al (78) and Munier-Marion et al (87) found reduced nosocomial influenza infections in single rooms and one study showed a reduced risk of norovirus infection. (82) By contrast, McDonald and colleagues (71) noted reduced infection rates for *Enterococcus* spp, *C difficile*, and MRSA. In a systematic review, Voigt et al (35) concluded that the quality of evidence did not support the use of single rooms over shared accommodation. Indeed, only two studies showed increased infections in shared accommodation. (26,83) Nevertheless, in one study patients (77) preferred single rooms for infection prevention. In a study of more than 1 million patients of all ages across 2018 hospitals in the USA, O'Neill and colleagues (95) found that single rooms were significantly associated with reductions in central-line-associated bloodstream infections.

Seven studies assessed routine care in children. (78,81,82,86,90,96,97) Two found a decrease in nosocomial infections in single rooms – one overall (78) and one for diarrhoea in gastrointestinal and neurosurgical units, (81) but the latter found no difference between accommodation types in a cardiological unit. In two large studies in Finland (n=1,927 and n=5,119), Kinnula and colleagues (96,97) saw increases in hospital-acquired infections among children admitted to shared accommodation in an infectious disease ward because there was no grouping by aetiology. All hospital-acquired infections with symptoms during the hospital stay and 49% of those manifesting after discharge led to diarrhoea. The risk of infection was doubled among children sharing accommodation with patients who had respiratory infections (OR 2.3, 95% CI: 1.1–4.8; p=0.03). Risk decreased per year of age. Among 83,334 children assessed in two hospitals, Quach et al (90) found significantly increased rates of respiratory infections when accommodation was more than 50% single rooms (rate per 1,000 patient-days 1.33, 95% CI 1.29–1.37).

## Intensive care

Outcomes in ICUs were reported specifically in 26 studies, 11 in adults and mixed-age populations, (13,17,18,66,68,70,73,85,91,92,98) one in children, (14) and 14 in neonates. (10,11,15,19,21,46,49,53,56,61,72,74,76,94)

Among adult populations, only one study showed outcomes in favour of shared accommodation, with reductions per 10,000 patient-days in cultures positive for *Enterobacter* spp, *Haemophilus*,

*Streptococcus viridans*, *Acinetobacter* spp, *Streptococcus pneumoniae*, Group B *Streptococcus* spp, *Neisseria* spp, and MRSA.(73) However, in the same study, single rooms showed lower rates of infections with many common organisms, such as *Staphylococcus* spp, *C difficile*, and *Pseudomonas* spp. Four studies showed significant data on reduced bacterial infection and transmission in single rooms based on isolates and antibiotic use,(17,66,70,91) although in the study by Halaby et al,(70) transmission of *Morganella* spp, *Proteus* spp, *Serratia* spp, and *Pseudomonas* spp did not differ between accommodation types. Two studies indicated reduced risks of bloodstream infections in single rooms.(17,92) As for routine care, patients perceived infection prevention to be better in single rooms than in share spaces.(68)

Among neonates and among children in ICUs, the findings were mixed. In favour of shared accommodation, four studies reported reduced cases of nosocomial sepsis,(10,15) one reduced colonisation with multidrug-resistant organisms,(46) and one nosocomial infections with pneumonia.(19) Four studies indicated no difference between accommodation types for sepsis or septicaemia and/or found that the use of single rooms was associated with fewer sepsis cases.(15,49,56,74) Only one study showed an increase in sepsis in shared accommodation, and that was specifically in neonates born at or after term.(15)

### **Patient safety**

11 studies considered patient safety (see Figure 3 and supplementary Table 7).(8,16,22,26,34–36,65,84,99,100). Three were before-and-after studies, four were contemporaneous studies, one used mixed design, and three were evidence syntheses. Two had low quality scores and three had high quality scores. Most of the studies assessed routine care or mixed care populations, and generally the populations were adults and elderly people.

Overall, the data showed no differences between accommodation types or favoured shared accommodation. Only the OECD study indicated reduced risk of falls in single rooms,(36) but the quality of this study was deemed to be very low due to reporting very few details of the research. Significantly lower rates of falls were seen in multi-bed accommodation in two studies.(16,22) The study of Poncette et al,(100) which analysed alarm data in an ICU, found that the number of alarms per bed per day was higher in single rooms than in shared accommodation.

### **Readmissions and reinterventions**

Only two studies reported on readmissions and reinterventions (see Figure 3 and supplementary Table 8). They were both contemporaneous studies and one had a quality score of 74% and one of 78%. One showed that single rooms were associated with lower rates of rehospitalisation.(48) The other favoured shared accommodation, with fewer patients returning to theatre within 6 weeks of treatment.(63)

### **Privacy**

Forty-eight publications, including six evidence syntheses, reported on privacy (see supplementary table 9).(8,9,19,26,28,30–34,36,38–42,44,47,51,58,59,68,77,86,98,99,101–122) Eighteen were before-and-after studies, 23 were contemporaneous studies, one used mixed designs, and six were evidence syntheses. Nine had low quality scores but 19 had high quality scores. They were mainly descriptive studies but overwhelmingly favoured single rooms.

## Routine care

Twenty-eight studies assessed privacy among adults receiving routine care,(8,26,28,30,31,33,34,36,39,41,42,58,77,99,101,102,105,108,109,112–119) with seven of these reporting statistical analyses.(26,28,30,36,41,42,105,114) Key aspects of privacy in single rooms were improved confidentiality when discussing personal information, use of private bathrooms, and privacy during early post-partum care (e.g., assistance with feeding). However, in the study by Florey and colleagues,(105) 83% of patients in shared rooms also reported feeling that they had adequate privacy. Likewise, the systematic reviews by Taylor and colleagues(34) and Dowdeswell and colleagues(32) found advantages and disadvantages with regards to privacy in all studies they assessed. Patients reported feeling as though they could ask more questions or make more remarks in single rooms than in shared accommodation, and more scored physicians' responses as being empathetic.(31) Qualitative or descriptive studies also strongly supported greater privacy in single rooms.(8,77,99,101,102,108,109,112,115–118,121)

Four studies assessed routine care among children.(86,104,111,120) Boztepe et al(111) found that children did not rank privacy highly and were more concerned about procedures being painful. In this study many of the children had extensive history of hospitalisation. The other three studies reported greater privacy in single rooms, but children also seemed to enjoy the social aspect of shared accommodation. The main reasons for preferring single rooms were private bathrooms and the capacity for family members to stay. Sleep was an important aspect of care in single rooms for children and parents. (58,86,120)

## Intensive care

Nine studies reported on privacy for adults in ICUs, and generally the findings favoured single rooms.(32,34,36,40,44,47,59,68,110) Three studies reported statistical evidence of improved privacy in single rooms among adult patients.(36,40,44) The literature reviews by Dowdeswell and colleagues(32) and Taylor and colleagues(34) showed mixed findings among studies.

Eleven studies addressed neonatal care in ICUs.(9,19,38,40,44,47,51,98,103,106,107) All but two(38,51) favoured single rooms for privacy.

## Loneliness/isolation and family contact

Fifty-five publications, five were evidence syntheses, reported patients' views about loneliness or family contact associated with single-room accommodation (see Figure 4 and supplementary Table 10).(9,16,19,25,26,28,30,32,33,36,38,39,42,44,45,47–49,49,50,54,57–59,68,74,77,86,98,99,102,104–110,114,115,117–120,123–132). Twenty were before-and-after studies, 29 were contemporaneous studies, one used mixed study designs, and five were evidence syntheses. Only nine had quality scores less than 50%, while high quality scores were assigned to 17.

Two main themes seemed to be revealed in patients' perspectives: shared accommodation were strongly preferred for social interaction to avoid loneliness/isolation,(9,16,26,28,33,38,47,58,68,77,86,102,104,105,109,114–120,123,124,126,129) whereas single rooms were preferred for privacy (e.g., for bathroom use, during consultations and visits, and to spend with children, particularly neonates).(9,28,32,38,45,47,49,49,50,54,57,59,68,74,77,86,98,104–106,108–110,114,127,130,132)

## Noise, disturbance, and sleep

Forty-five publications, four of which were evidence syntheses, reported patients' views about noise, disturbance, and sleep associated with single-room accommodation (see Figure 4 and supplementary Table 11). (8,9,24–26,28,30,32,33,36,38–42,47,54,58,59,68,76,77,86,103,105,107,108,110,112–114,117–119,131,133–141) Sixteen were before-and-after studies, 24 were contemporaneous studies, one used mixed study designs, and four were evidence syntheses. Nine had quality scores less than 50% and 13 had high quality scores.

In general, patients felt that single rooms were quieter and led to less sleep disruption. However, measurement of noise levels showed that there were no substantial objective differences between single rooms and shared accommodation. (30,54,135) One study reported lower noise levels in single rooms, but the difference was not statistically assessed. (76) Stevens et al (54) and Meyer et al (139) found that respiratory support and other medical devices could raise noise levels in single rooms enough to disturb sleep even when ambient noise had been reduced. HCPs also reported that single rooms improved patients' sleep. (9) Poncette and colleagues (100) found that fewer alarms raised in shared accommodation reduced overall noise levels. One study also noted that patients preferred single rooms because they felt they were less likely to disturb other patients. (119) Most studies addressing sleep found that it was improved in single rooms.

(28,30,32,33,36,58,59,86,113,114,117,118,136,140) This was generally due to fewer disturbances and/or a perceived quieter environment than in shared accommodation. Hosseini and colleagues (114) and Sakr and colleagues (140) noted that the risk of new-onset insomnia was significantly higher among patients in shared accommodation (95.7% vs 75%,  $p=0.011$ ).

Humidity and temperature were discussed in one article. Van Enk and colleagues (135) reported that in a NICU with centrally controlled humidity, shared accommodation had non-significantly lower percentage of relative humidity than single rooms but showed much greater variance (26.8% ( $\pm 17.0$ ) in single rooms vs 26.0% ( $\pm 89.0$ )). Both mean values were lower than the recommended range for NICU (30–60%). Temperature could be controlled within individual single rooms and mean values were significantly lower than those in the shared accommodation, which had central temperature control per nursery (mean 73.8°F [range 65.3–77.5°F] in single rooms vs 76.0°F [range 71.1–84.5°F],  $p=0.0001$ ). More than 85% of readings in both, though, were within the recommended range of 72–78°F, although readings outside the range were too hot in shared accommodation and too cold in single rooms. The authors suggested that thermostats should be allowed to vary only within the recommended range.

Lighting was assessed in three studies, two of which favoured single rooms due to less illumination for neonates (40,54) and one study of patients with delirium that favoured lower light in a shared accommodation. (24)

## Satisfaction with care

Fifty-one publications, six of which were evidence syntheses, reported patients' satisfaction with care (see Figure 4 and supplementary Table 12). (8,12,19,25,27,28,30,32,33,35,36,38–40,42,44,49,50,57,58,60,62,74,77,86,99,101,103,105,107–109,111–114,116–119,121,125,128,129,131,133,136,142–146) Fifteen were before-and-after studies, 29 were contemporaneous studies, one used mixed study designs, one was an economic analysis and six were evidence syntheses. The quality scores of ten studies were less than 50% and of 14 were 75–100%.

Overall, results show either little difference between accommodation types or results in favour of single rooms. Single rooms seemed to be favoured most by mothers in maternity units, whereas preference towards shared accommodation seemed to increase with rising age. The economic analysis found that patients were willing to pay for private care to have single rooms.(146)

### Routine care

Routine care was assessed in 30 studies (see supplementary table 12). (8,27,28,30,32,33,35,36,39,42,58,77,86,99,101,105,111–114,116–118,121,129,131,133,136,143,144) Patients preferred shared accommodation in seven studies.(33,86,116–118,129,133) Generally they preferred interaction with other patients, and in two reports they stated that they found the shared accommodation more secure and safe.(117,118) Specific reasons given for preferring single rooms were privacy,(30,58,77,99,112,131,133) comfort/environment,(27,42,101,108,143), level of care and information, effect on recovery,(32,36,42,101,113,114,136) and safety.(30,35)

### Intensive care

We found 24 reports of intensive care(12,19,25,32,36,38,40,44,50,57–60,62,74,103,107,108,125,128,130,131,143,145). Only two reported findings that favoured shared accommodation. Campbell-Yeo et al(50) found that in an open-bay NICU, mothers reported better self-efficacy and less uncertainty about their babies' health. Also in a NICU, Pineda and colleagues(57) found that the risk of stress among mothers was significantly lower in shared accommodation than in single rooms, although life stress did not differ between accommodation types. By contrast, other assessments of stress found that risk was reduced in single rooms(19,25,60,74,130) or did not differ.(50,62,130) Satisfaction with design/environment, where assessed, favoured single rooms.(59,108)

Findings on satisfaction with maternity care was greater for parents in single rooms in three studies(12,59,60) but did not differ between accommodation types in two.(74,145) Single rooms seemed to have little effect on postpartum depression or irritability, most measures not differing between accommodation types(57,62,74,130,145) and only four findings favouring single rooms.(19,25,50,130)

Only eight of the 51 studies were related to satisfaction with care in other patient populations, involving cardiovascular, cancer, adolescent, or mixed adult care.(12,32,36,58,108,128,131,143) All these studies' findings supported single rooms.

### Patient monitoring and safeguarding

Although the impact of single rooms on healthcare staff was not the focus of this review, 14 of the included publications reported the views of HCPs as well as patient-reported outcomes that we used to explore monitoring of patients (see Figure 4 and supplementary Table 13). (11,13,17,21,28,30,47,68,77,106,108,112,114,133) Four were before-and-after studies, eight were contemporaneous studies, one used mixed study designs, and one was an evidence synthesis. No study had a low-quality score. Five of the studies were classified as being of high quality.

Most of the studies presented descriptive/qualitative findings. Three studies reported statistically assessed data, all in relation to routine care and among adult patients. Two(28,114) favoured single

rooms, reporting that availability to patients, meeting patients' needs, and access to patients were improved. The fourth study showed no difference between single rooms and shared accommodation for responding to patients' call alerts. One study reported that nurses felt they might spend longer with patients in single rooms, depriving other patients of as much care.(106) In another, safety of patients in units with single rooms was raised as an issue due to increased distances between nurses and patients and impeded observation of patients.(68)

### **Patient confidentiality**

Confidentiality was assessed in 11 studies (see Figure 4 and supplementary Table 14).(26,36,47,68,77,105,106,109,114,115) Five were before-and-after studies, four were contemporaneous studies, one used mixed study designs, and one was an evidence synthesis. Two studies had low quality scores while four had high quality scores.

All studies concluded that patient confidentiality was better maintained when patients were in single rooms, with one study finding no difference for adults with cardiovascular disease in ICU(108) (see supplementary table 14). Malcom et al(115) found that the lack of privacy and confidentiality in shared accommodation affected patients' relationships with other patients.

### **Availability of beds, space requirements, and capital costs**

Sixteen studies reported on beds, space, and costs associated with different accommodation types (see Figure 5 and supplementary Table 15).(10,12,13,21,26,27,38,57,67,90,96,97,106,108,126,147) Nine were before-and-after studies, six were contemporaneous studies, and one used mixed study designs. Two studies had quality scores below 50% and three were classified as being of high quality.

There did not seem to be strong evidence in favour of either accommodation type. The inclusion of single rooms substantially increases the amount of floor space required to achieve the same number of beds as in shared accommodation, with estimates suggesting between 30% and 50% more floor space being required per bed, which increases capital costs.(10,12,26,27,106,126,147) Shared accommodation provides greater flexibility to add beds in times of need.(13,21,57,90,97) Darley and colleagues(67) found that numbers of bed-days lost due to ward closures caused by norovirus outbreaks was greatly reduced after moving to a hospital with 75% single rooms from the previous 10% single rooms.

### **Length of stay**

Fifty-three publications, including two evidence syntheses, reported on length of stay associated with single-room accommodation (see Figure 5 and supplementary Table 16).(7–13,15–20,22–27,35,36,40,41,43,46–49,52,53,55,56,60–63,65,69,73–75,85,91,96,96,107,112,113,125,134,143,147–149) Twenty-eight were before-and-after studies, 23 were contemporaneous studies, one used mixed study designs, and two were evidence syntheses. Five of the studies were classified as being of low quality but only seven fell into the high-quality category. The evidence was highly mixed with no clear benefit from either accommodation type.

## Routine care

Of 20 studies assessing routine care, 18 concerned adults and the elderly.(7,8,22,26,27,35,36,41,63,65,69,77,112,113,134,143,147,149) Among these, eight found that length of stay was shorter in single rooms,(7,16,26,27,41,65,112,147,149) but in the study by Maben et al(26) this was true only for an older people's ward and not for a medical assessment unit, and in that by Lawson and Phiri,(27) while it was true for non-surgical orthopaedic patients and psychiatric patients, no difference was seen for surgical orthopaedic patients. One study found that length of stay was shorter in shared accommodation among older patients with dementia, overall and among those who had experienced inpatient falls.(22) No difference in overall length of stay was reported in seven studies, including two evidence syntheses.(8,35,36,63,69,134,143)

The two studies of routine care in children by Kinnula and colleagues showed no difference between accommodation types in one(96) but longer duration of admissions among children in shared accommodation in another.(97)

## Intensive care

Of 32 studies assessing length of stay in intensive care, 23 considered neonates(9–11,15,19,23,40,43,46,47,47,48,52,53,55,56,60–62,74,91,107,125,130,148) and nine adults.(12,13,17,18,20,24,73,75,85) As for routine care, the results were highly mixed.

Among the nine studies assessing care of adults in ICUs, five showed no significant differences between single rooms and shared accommodation.(12,13,24,24,75) Teltsch et al(73) assessed care after a change from multi-bed to single rooms and compared the findings to a hospital with no change. The length of stay in the ICU in the comparator hospital increased year on year from 3.8 days to 4.2 days from 2000 to 2005. While higher after the change to single rooms, the length of stay did not change substantially over the same period, and after adjustment was an estimated 10% lower overall (relative ratio 0.90, 95% CI 0.71–1.19). Bracco and colleagues(17) reported that patients were able to stay longer in the same bed in single rooms during infection outbreaks in an ICU, although overall LOS was not significantly different.

In NICUs, statistically significant shorter durations of stay in hospital were reported in three studies. Puumala and colleagues(15) found that stays were shorter for very and extremely preterm babies, but there was no difference between accommodation types for moderately preterm babies, and stays for term and post-term babies were shorter in shared accommodation. Lehtonen et al(23) found that stays were on average 3.4 days shorter (95% CI 3.1–4.7) and van Veenendaal et al(74) found a median difference of 2 days in favour of single rooms. Qualitative/descriptive studies also favoured single rooms in five studies.(9,40,47,107) Three studies identified shorter stays in shared accommodation,(19,56,148) but 13 found no difference between accommodation types(10,11,43,46,48,52,53,55,60–62,125,130).

## Costs of care

Nineteen publications, including two evidence syntheses, reported on costs or resource use associated with different types of accommodation (see Figure 5 and supplementary Table 17).(8,16,19,22,25,26,35,41,54,63,91,107,110,132,133,146,148,150) Eight were before-and-after studies, seven were contemporaneous studies, two used mixed study designs, and two were evidence syntheses. Four studies had low quality scores and six had high quality scores.



Several studies reported multiple measures of costs and found evidence supporting both types of accommodation. Therefore, the evidence split was 10 studies finding in favour of single rooms, 10 in favour of shared accommodation and six showing no difference in measures.

Boardman and Forbes recommended taking into account the following construction and running costs, given that single-room facilities required more space to construct: land costs, construction costs, maintenance (refinishing and updating), housekeeping and operating costs, and health care provision (potentially longer distances to cover). Maben et al(26,133) estimated in 2015 that the cost of building a hospital solely comprising single rooms could be around 5% more than building one with predominantly shared accommodation but suggested that the difference becomes marginal over time. Harris and colleagues(25) found that the most cost-effective configuration in terms of construction costs per square foot was a combination of open bays and single rooms.

Findings in favour of single rooms were due to reduced overall staffing costs,(41,150) reduced length of stay,(91,107) reduced waiting and transfer times,(146) higher proportions of patients being discharged to rehabilitation,(63) reduced infections,(91) and operational efficiencies.(35,148) Reasons favouring shared accommodation were lower cleaning and housekeeping costs,(26,133) perceived increased nursing staff,(26,148) and lower labour costs in NICUs.(148)

## DISCUSSION

This systematic review identified a substantial body of evidence associated with hospital accommodation, yet no clearly consistent conclusions could be drawn about overall benefits of single rooms versus multi-bed ward spaces. The narrative and heterogeneous nature of much of the evidence also meant that a formal statistical synthesis, such as a meta-analysis, was not feasible. Nevertheless, some themes did emerge and might be worth considering further. Single rooms were most likely to be associated with overall clinical benefit for the most severely ill patients, especially neonates in intensive care, although the evidence is mixed even in these high-risk populations. Patients who preferred single rooms tended to do so for privacy, particularly having a private bathroom, and for reduced disturbances. By contrast, there were distinct patterns of men, older adults, children, and adolescents being more likely to prefer shared accommodation, particularly for the social aspects. While mixed accommodation types seemed to be the most cost-effective approach to construction because the capital cost of single room building is higher than that for shared accommodation, the running costs seem likely to be recouped over time by other efficiencies.

While patients and HCPs expressed preferences, health-care outcomes seem unlikely to be substantially affected by hospital accommodation. This is reassuring because most patients also have little influence over this aspect of their care. Likewise, HCPs might also have little influence over which accommodation type their patients are assigned. Patient or family preferences for single rooms are particularly strong in NICUs and maternity wards, but other groups, in particular men, older adults and adolescents, are more likely to prefer shared accommodation. The split of accommodation and whether the predictable adverse effects of accommodation design can be mitigated in these areas would be worth considering at the planning stages of new buildings.

The average cost per patient of units comprising only single rooms was lower than those consisting of only shared accommodation. Mean direct cost per patient in a single room has been estimated to be 15.5% lower for neonates in ICU and 24% lower for care in maternity units but may be similar or reduced in adults in routine care wards. Shorter length of stay was an important contributor to this

difference and could increase the number of patients who can be treated in the beds available. However, the effects found were small and local variations may change the economic picture for a particular hospital. It is also unclear how far the reduced length of stay was due to the single room, and how much was caused by confounding factors associated with being in a new hospital. Nearly all the studies we considered were from high-income regions and mostly based in European or anglophone countries. Thus, policy makers should incorporate local building and labour costs in decisions.

Determining the impact of moving to single-room wards will therefore always need to overcome the impact of confounding factors such as concomitant changes to processes and improvements in other facilities and services that may also have led to the changes, or that may have acted in opposition to the direct effects of the different accommodation.

This study has some limitations. Of 215 articles originally retrieved, we selected 145 for review, which is still a large number. None of the 145 studies used randomised study designs. Randomised controlled studies are not practical to assess hospital accommodation and, therefore, most studies were prone to bias. In particular, in hospitals with mixed single rooms and shared accommodation, patients must be allocated to the rooms, which will be partly due to their medical condition or other personal factors and partly due to bed availability at the time of admission. This introduces selection bias, as the reasons why patients were in single rooms was often not reported. We minimised this bias by excluding studies where the allocation to single rooms or shared accommodation was known to be for an apparent clinical purpose. Additionally, 60 of the publications compared outcomes before and after moving from shared accommodation to single rooms. This introduced confounding, as many factors other than the studied intervention would have changed at the same time, so attributing the outcome to the intervention alone is misleading. The opportunity of building a new hospital is rare. While it provides an ideal platform for before-and-after studies, nearly all of these studies were of a single hospital, so the total number of hospitals studied is low, meaning that uncertainty about risks and benefits remains after this systematic review.

In practical terms, although there are still uncertainties about the true impact of changing to single room wards, the 145 publications synthesised in this report show that the clinical and economic consequences of such a change are likely to be modest. Focussed research on the impact of accommodation type on hospital acquired airborne transmitted infections may be warranted, as may studies of sufficient duration to examine long term productivity changes after opening a new hospital. Because the global effect sizes found were modest, the effects within national systems or for specialist hospitals might be different in size and direction from the global. In particular, none of the included studies were in low or middle income countries, so generalisability to those settings is difficult.

## **ACKNOWLEDGMENTS**

All authors wrote sections of the final manuscript. DMcP conceived the study and defined the research question. AM defined the detailed method and arbitrated disagreements. AB and NC conducted the literature screening and data extraction. CS developed the figures and summary tables. The corresponding author attests that all listed authors meet authorship criteria and that no others meeting the criteria have been omitted.

The Corresponding Author has the right to grant on behalf of all authors and does grant on behalf of all authors, a worldwide licence to the Publishers and its licensees in perpetuity, in all forms, formats

and media (whether known now or created in the future), to i) publish, reproduce, distribute, display and store the Contribution, ii) translate the Contribution into other languages, create adaptations, reprints, include within collections and create summaries, extracts and/or, abstracts of the Contribution, iii) create any other derivative work(s) based on the Contribution, iv) to exploit all subsidiary rights in the Contribution, v) the inclusion of electronic links from the Contribution to third party material where-ever it may be located; and, vi) licence any third party to do any or all of the above.

The lead author affirms that the manuscript is an honest, accurate, and transparent account of the study being reported; that no important aspects of the study have been omitted; and that any discrepancies from the study as originally planned (and, if relevant, registered) have been explained.

## COMPETING INTERESTS

No authors have had financial relationships with any organisations that might have an interest in the submitted work in the previous 3 years. No authors have other relationships or activities that could appear to have influenced the submitted work.

## FUNDING

The study was funded by The New Hospital Programme, Department of Health and Social Care, which commissioned the overall research area but had no input into the study design, the collection, analysis, and interpretation of data, the writing of the report, or decision to submit the article for publication. All authors, external and internal, had full access to all of the data (including statistical reports and tables) in the study and can take responsibility for the integrity of the data and the accuracy of the data analysis.

## REGISTRATION

PROSPERO registration number CRD42022311689, registered on 2<sup>nd</sup> March 2022, after preliminary searches were undertaken and before formal screening began.

## REFERENCES

1. UK Government. PM confirms £3.7 billion for 40 hospitals in biggest hospital building programme in a generation [Internet]. GOV.UK. [cited 2022 Jul 11]. Available from: <https://www.gov.uk/government/news/pm-confirms-37-billion-for-40-hospitals-in-biggest-hospital-building-programme-in-a-generation>
2. Health and Social Care Committee. Oral evidence: Clearing the backlog after the pandemic, HC 599 [Internet]. 2021 [cited 2022 Jul 11]. Available from: <https://committees.parliament.uk/oralevidence/2817/pdf/>
3. Oliver D. David Oliver: Should single rooms be the default for NHS inpatients? *BMJ*. 2021 Nov 3;n2612.
4. Pennington H, Isles C. Should hospitals provide all patients with single rooms? *BMJ*. 2013 Sep 24;347(sep24 2):f5695–f5695.

5. Downs SH, Black N. The feasibility of creating a checklist for the assessment of the methodological quality both of randomised and non-randomised studies of health care interventions. *J Epidemiol Community Health*. 1998 Jun 1;52(6):377–84.
6. Campbell M, McKenzie JE, Sowden A, Katikireddi SV, Brennan SE, Ellis S, et al. Synthesis without meta-analysis (SWiM) in systematic reviews: reporting guideline. *BMJ*. 2020 Jan 16;368:l6890.
7. Cantoni N, Weisser M, Buser A, Arber C, Stern M, Heim D, et al. Infection prevention strategies in a stem cell transplant unit: impact of change of care in isolation practice and routine use of high dose intravenous immunoglobulins on infectious complications and transplant related mortality - Cantoni - 2009 - *European Journal of Haematology* - Wiley Online Library [Internet]. [cited 2022 Jul 11]. Available from: <https://onlinelibrary.wiley.com/doi/10.1111/j.1600-0609.2009.01249.x>
8. Davis M, Elliott R, Hills R, Fry M. Single-Room Ward Design and Its Impact on Service and Patient Outcomes: An Evaluation Study. *Orthop Nurs*. 2019 Oct;38(5):317–25.
9. Domanico R, Davis DK, Coleman F, Davis BO. Documenting the NICU design dilemma: parent and staff perceptions of open ward versus single family room units. *J Perinatol*. 2010 May;30(5):343–51.
10. Domanico R, Davis DK, Coleman F, Davis BO. Documenting the NICU design dilemma: comparative patient progress in open-ward and single family room units. *J Perinatol*. 2011 Apr;31(4):281–8.
11. Jansen SJ, Lopriore E, Berkhout RJM, van der Hoeven A, Saccoccia B, de Boer JM, et al. The Effect of Single-Room Care Versus Open-Bay Care on the Incidence of Bacterial Nosocomial Infections in Pre-Term Neonates: A Retrospective Cohort Study. *Infect Dis Ther*. 2021 Mar;10(1):373–86.
12. Jongerden IP, Slooter AJ, Peelen LM, Wessels H, Ram CM, Kesecioglu J, et al. Effect of intensive care environment on family and patient satisfaction: a before–after study. *Intensive Care Med*. 2013 Sep 1;39(9):1626–34.
13. Jung J, Choe PG, Choi S, Kim E, Lee HY, Kang CK, et al. Reduction in the acquisition rate of carbapenem-resistant *Acinetobacter baumannii* (CRAB) after room privatization in an intensive care unit. *J Hosp Infect*. 2022 Mar 1;121:14–21.
14. Lazar I, Abukaf H, Sofer S, Peled N, Leibovitz E. Impact of Conversion from an Open Ward Design Paediatric Intensive Care Unit Environment to All Isolated Rooms Environment on Incidence of Bloodstream Infections and Antibiotic Resistance in Southern Israel (2000 to 2008) [Internet]. [cited 2022 Jul 11]. Available from: [https://journals.sagepub.com/doi/10.1177/0310057X1504300106?url\\_ver=Z39.88-2003&rfr\\_id=ori:rid:crossref.org&rfr\\_dat=cr\\_pub%20%20pubmed](https://journals.sagepub.com/doi/10.1177/0310057X1504300106?url_ver=Z39.88-2003&rfr_id=ori:rid:crossref.org&rfr_dat=cr_pub%20%20pubmed)
15. Puumala SE, Rich RK, Roy L, Reynolds R, Jimenez FE, Opollo JG, et al. Single-family room neonatal intensive care unit design: do patient outcomes actually change? | *Journal of Perinatology* [Internet]. [cited 2022 Jul 11]. Available from: <https://www.nature.com/articles/s41372-019-0584-6>
16. Singh I, Okeke J, Edwards C. Outcome of in-patient falls in hospitals with 100% single rooms and multi-bedded wards. *Age Ageing*. 2015 Nov;44(6):1032–5.

17. Bracco D, Dubois MJ, Bouali R, Eggimann P. Single rooms may help to prevent nosocomial bloodstream infection and cross-transmission of methicillin-resistant *Staphylococcus aureus* in intensive care units. *Intensive Care Med*. 2007 May 1;33(5):836–40.
18. Caruso P, Guardian L, Tiengo T, dos Santos LS, Junior PM. ICU Architectural Design Affects the Delirium Prevalence: A Comparison Between Single-Bed and Multibed Rooms\*. *Crit Care Med*. 2014 Oct;42(10):2204–10.
19. Harris DD, Shepley MM, White RD, Kolberg KJS, Harrell JW. The impact of single family room design on patients and caregivers: executive summary. *J Perinatol*. 2006 Oct;26(3):S38–48.
20. Hyun M, Lee JY, Kwon YS, Kim JY, Park JS, Park S, et al. COVID-19: Comparing the applicability of shared room and single room occupancy. *Transbound Emerg Dis*. 2021 Jul;68(4):2059–65.
21. Julian S, Burnham CAD, Sellenriek P, Shannon WD, Hamvas A, Tarr PI, et al. Impact of Neonatal Intensive Care Bed Configuration on Rates of Late-Onset Bacterial Sepsis and Methicillin-Resistant *Staphylococcus aureus* Colonization. *Infect Control Hosp Epidemiol*. 2015 Oct;36(10):1173–82.
22. Knight S, Singh I. Profile of inpatient falls in patients with dementia: A prospective comparative study between 100% single rooms and traditional multibedded wards. *J Clin Gerontol Geriatr*. 2016 Sep;7(3):87–92.
23. Lehtonen L, Lee SK, Kusuda S, Lui K, Norman M, Bassler D, et al. Family Rooms in Neonatal Intensive Care Units and Neonatal Outcomes: An International Survey and Linked Cohort Study. *J Pediatr*. 2020 Nov;226:112-117.e4.
24. Zaal IJ, Spruyt CF, Peelen LM, van Eijk MMJ, Wientjes R, Schneider MME, et al. Intensive care unit environment may affect the course of delirium. *Intensive Care Med*. 2013 Mar;39(3):481–8.
25. Harris D, McCuskey M, White R. [impact\\_of\\_single\\_family\\_nicu\\_rooms\\_1.pdf](https://www.healthdesign.org/system/files/impact_of_single_family_nicu_rooms_1.pdf) [Internet]. 2006 [cited 2022 Jul 12]. Available from: [https://www.healthdesign.org/system/files/impact\\_of\\_single\\_family\\_nicu\\_rooms\\_1.pdf](https://www.healthdesign.org/system/files/impact_of_single_family_nicu_rooms_1.pdf)
26. Maben J, Griffiths P, Penfold C, Simon M, Anderson JE, Robert G, et al. One size fits all? Mixed methods evaluation of the impact of 100% single-room accommodation on staff and patient experience, safety and costs. *BMJ Qual Saf*. 2016 Apr 1;25(4):241–56.
27. Lawson B, Phiri M. Hospital design. Room for improvement. *Health Serv J*. 2000 Jan 20;110(5688):24–6.
28. Ehrlander W, Ali F, Chretien KC. Multioccupancy hospital rooms: Veterans' experiences and preferences. *J Hosp Med*. 2009;4(8):E22–7.
29. McKeown K, Haase T, Pratschke J, Twomey S, Donovan H, Engling F. Determinants of care outcomes for patients who die in hospital in Ireland: a retrospective study. *BMC Palliat Care*. 2015 Dec;14(1):11.
30. Nahas S, Patel A, Duncan J, Nicholl J, Nathwani D. Patient Experience in Single Rooms Compared with the Open Ward for Elective Orthopaedic Admissions. *Musculoskeletal Care*. 2016 Mar;14(1):57–61.

31. van de Glind I, van Dulmen S, Goossensen A. Physician–patient communication in single-bedded versus four-bedded hospital rooms. *Patient Educ Couns*. 2008 Nov 1;73(2):215–9.
32. Dowdeswell B, Erskine J, Heasman M. A Report for NHS Estates, England by the EU Health Property Network. :40.
33. Søndergaard SF, Beedholm K, Kolbæk R, Frederiksen K. Patients’ and Nurses’ Experiences of All Single-Room Hospital Accommodation: A Scoping Review. *HERD Health Environ Res Des J*. 2022 Jan;15(1):292–314.
34. Taylor E, Card AJ, Piatkowski M. Single-Occupancy Patient Rooms: A Systematic Review of the Literature Since 2006. *HERD Health Environ Res Des J*. 2018 Jan;11(1):85–100.
35. Voigt J, Mosier M, Darouiche R. Private Rooms in Low Acuity Settings: A Systematic Review of the Literature. *HERD Health Environ Res Des J*. 2018 Jan;11(1):57–74.
36. OECD, World Health Organization. Improving Healthcare Quality in Europe: Characteristics, Effectiveness and Implementation of Different Strategies [Internet]. OECD; 2019 [cited 2022 Jul 11]. Available from: [https://www.oecd-ilibrary.org/social-issues-migration-health/improving-healthcare-quality-in-europe\\_b11a6e8f-en](https://www.oecd-ilibrary.org/social-issues-migration-health/improving-healthcare-quality-in-europe_b11a6e8f-en)
37. Rechel B, European Health Property Network, European Observatory on Health Systems and Policies, editors. Capital investment for health: case studies from Europe. Copenhagen, Denmark: European Health Property Network; European Observatory on Health Systems and Policies; 2009. 190 p. (Observatory studies series).
38. Stelwagen M, van Kempen A, Westmaas A, Vet E, Scheele F. Parents’ Experiences With a Model of Integrated Maternity and Neonatal Care Designed to Empower Parents. *J Obstet Gynecol Neonatal Nurs*. 2021 Mar;50(2):181–92.
39. Olson ME, Smith MJ. An evaluation of single-room maternity care. *Health Care Manag*. 1992 Sep;11(1):43–9.
40. Carter BS, Carter A, Bennett S. Families’ views upon experiencing change in the neonatal intensive care unit environment: from the ‘baby barn’ to the private room. *J Perinatol Off J Calif Perinat Assoc*. 2008 Dec;28(12):827–9.
41. Harris SJ, Farren MD, Janssen PA, Klein MC, Lee SK. Single Room Maternity Care: Perinatal Outcomes, Economic Costs, and Physician Preferences. *J Obstet Gynaecol Can*. 2004 Jul;26(7):633–40.
42. Janssen PA, Klein MC, Harris SJ, Soolsma J, Seymour LC. Single Room Maternity Care and Client Satisfaction. *Birth*. 2000;27(4):235–43.
43. Lester BM, Hawes K, Abar B, Sullivan M, Miller R, Bigsby R, et al. Single-Family Room Care and Neurobehavioral and Medical Outcomes in Preterm Infants. *Pediatrics*. 2014 Oct 1;134(4):754–60.
44. Swanson JR, Peters C, Lee BH. NICU redesign from open ward to private room: a longitudinal study of parent and staff perceptions. *J Perinatol*. 2013 Jun;33(6):466–9.

45. Toivonen M, Lehtonen L, Löyttyniemi E, Axelin A. Effects of single-family rooms on nurse-parent and nurse-infant interaction in neonatal intensive care unit. *Early Hum Dev.* 2017 Mar 1;106–107:59–62.
46. van der Hoeven A, Bekker V, Jansen SJ, Saccoccia B, Berkhout RJM, Lopriore E, et al. Impact of transition from open bay to single room design neonatal intensive care unit on multidrug-resistant organism colonization rates. *J Hosp Infect.* 2022 Feb;120:90–7.
47. Bodack E, Schenk O, Karutz H. Die Einrichtung von Einzelzimmern auf neonatologischen Intensivstationen – Auswirkungen auf die Betreuung aus Sicht der Eltern. *Z Für Geburtshilfe Neonatol.* 2016 Jun;220(3):124–9.
48. Erdeve O, Arsan S, Yigit S, Armangil D, Atasay B, Korkmaz A. The impact of individual room on rehospitalization and health service utilization in preterms after discharge. *Acta Paediatr.* 2008;97(10):1351–7.
49. Tandberg BS, Flacking R, Markestad T, Grundt H, Moen A. Parent psychological wellbeing in a single-family room versus an open bay neonatal intensive care unit. Baud O, editor. *PLOS ONE.* 2019 Nov 5;14(11):e0224488.
50. Campbell-Yeo M, Kim T, Disher T, Richardson B, Dol J, Bishop T, et al. Do Single-Family Rooms Increase Parental Presence, Involvement, and Maternal Well-Being in Neonatal Intensive Care? *J Perinat Neonatal Nurs.* 2021 Oct;35(4):350–61.
51. Dowling DA, Blatz MA, Graham G. Mothers’ Experiences Expressing Breast Milk for Their Preterm Infants: Does NICU Design Make a Difference? *Adv Neonatal Care.* 2012 Dec;12(6):377–84.
52. Erickson C, Kattelman K, Ren C, Helseth CC, Stevens DC. Traditional open-bay versus single-family room neonatal intensive care unit: a comparison of selected nutrition outcomes. *Res Rep Neonatol.* 2011 Mar;15.
53. Hourigan SK, Subramanian P, Hasan NA, Ta A, Klein E, Chettout N, et al. Comparison of Infant Gut and Skin Microbiota, Resistome and Virulome Between Neonatal Intensive Care Unit (NICU) Environments. *Front Microbiol.* 2018 Jun 25;9:1361.
54. Stevens DC, Helseth CC, Thompson PA, Pottala JV, Khan MA, Munson DP. A Comprehensive Comparison of Open-Bay and Single-Family-Room Neonatal Intensive Care Units at Sanford Children’s Hospital. *HERD.* 2012;5(4):23–39.
55. Grundt H, Tandberg BS, Flacking R, Drageset J, Moen A. Associations Between Single-Family Room Care and Breastfeeding Rates in Preterm Infants. *J Hum Lact.* 2021 Aug;37(3):593–602.
56. Vohr B, McGowan E, McKinley L, Tucker R, Keszler L, Alksnini B. Differential Effects of the Single-Family Room Neonatal Intensive Care Unit on 18- to 24-Month Bayley Scores of Preterm Infants. *J Pediatr.* 2017 Jun;185:42-48.e1.
57. Pineda RG, Stransky KE, Rogers C, Duncan MH, Smith GC, Neil J, et al. The single-patient room in the NICU: maternal and family effects. *J Perinatol.* 2012 Jul;32(7):545–51.
58. Nassery W, Landgren K. Parents’ Experience of Their Sleep and Rest When Admitted to Hospital with Their Ill Child: A Qualitative Study. *Compr Child Adolesc Nurs.* 2019 Oct 2;42(4):265–79.

59. Stevens DC, Helseth CC, Khan MA, Munson DP, Reid EJ. A Comparison of Parent Satisfaction in an Open-Bay and Single-Family Room Neonatal Intensive Care Unit. *HERD Health Environ Res Des J*. 2011 Apr;4(3):110–23.
60. Lester BM, Salisbury AL, Hawes K, Dansereau LM, Bigsby R, Lupton A, et al. 18-Month Follow-Up of Infants Cared for in a Single-Family Room Neonatal Intensive Care Unit. *J Pediatr*. 2016 Oct;177:84–9.
61. Monson BB, Eaton-Rosen Z, Kapur K, Liebenthal E, Brownell A, Smyser CD, et al. Differential Rates of Perinatal Maturation of Human Primary and Nonprimary Auditory Cortex. *eneuro*. 2018 Jan;5(1):ENEURO.0380-17.2017.
62. Erdevi O, Arsan S, Canpolat F, Ertem I, Karagol B, Atasay B, et al. Does Individual Room Implemented Family-Centered Care Contribute to Mother–Infant Interaction in Preterm Deliveries Necessitating Neonatal Intensive Care Unit Hospitalization? *Am J Perinatol*. 2009 Feb;26(02):159–64.
63. Felice Tong YY, Karunaratne S, Youlden D, Gupta S. The Impact of Room-Sharing on Length of Stay After Total Hip or Knee Arthroplasty: A Retrospective Study. *Arthroplasty Today*. 2021 Apr;8:289-294.e2.
64. Scottish Intercollegiate Guidelines Network, Healthcare Improvement Scotland. *Delirium: a booklet for people who have experienced delirium, and for their carers*. 2020.
65. Blandfort S, Gregersen M, Rahbek K, Juul S, Damsgaard EM. Single-bed rooms in a geriatric ward prevent delirium in older patients. *Aging Clin Exp Res*. 2020 Jan;32(1):141–7.
66. Bonizzoli M, Bigazzi E, Peduto C, Tucci V, Zagli G, Pecile P, et al. Microbiological survey following the conversion from a bay-room to single-room intensive care unit design. *J Hosp Infect*. 2011 Jan;77(1):84–6.
67. Darley ESR, Vasant J, Leeming J, Hammond F, Matthews S, Albur M, et al. Impact of moving to a new hospital build, with a high proportion of single rooms, on healthcare-associated infections and outbreaks. *J Hosp Infect*. 2018 Feb;98(2):191–3.
68. Ferri M, Zygun DA, Harrison A, Stelfox HT. Evidence-based design in an intensive care unit: End-user perceptions. *BMC Anesthesiol*. 2015 Dec;15(1):57.
69. Gregersen M, Mellekjær A, Foss CH, Blandfort S. Use of single-bed rooms may decrease the incidence of hospital-acquired infections in geriatric patients: A retrospective cohort study in Central Denmark region. *J Health Serv Res Policy*. 2021 Oct;26(4):282–8.
70. Halaby T, al Naiemi N, Beishuizen B, Verkooijen R, Ferreira JA, Klont R, et al. Impact of single room design on the spread of multi-drug resistant bacteria in an intensive care unit. *Antimicrob Resist Infect Control*. 2017 Dec;6(1):117.
71. McDonald EG, Dendukuri N, Frenette C, Lee TC. Time-Series Analysis of Health Care–Associated Infections in a New Hospital With All Private Rooms. *JAMA Intern Med*. 2019 Nov 1;179(11):1501.
72. Song X, Soghier L, Floyd TT, Harris TR, Short BL, DeBiasi RL. Reassessing the need for active surveillance of extended-spectrum beta-lactamase–producing Enterobacteriaceae in the neonatal intensive care population. *Infect Control Hosp Epidemiol*. 2018 Dec;39(12):1436–41.



73. Teltsch DY, Hanley J, Loo V, Goldberg P, Gursahaney A, Buckeridge DL. Infection Acquisition Following Intensive Care Unit Room Privatization. *Arch Intern Med* [Internet]. 2011 Jan 10 [cited 2022 Jul 14];171(1). Available from: <http://archinte.jamanetwork.com/article.aspx?doi=10.1001/archinternmed.2010.469>
74. van Veenendaal NR, van der Schoor SRD, Heideman WH, Rijnhart JJM, Heymans MW, Twisk JWR, et al. Family integrated care in single family rooms for preterm infants and late-onset sepsis: a retrospective study and mediation analysis. *Pediatr Res*. 2020 Oct;88(4):593–600.
75. Vietri NJ, Dooley DP, Davis CE, Longfield JN, Meier PA, Whelen AC. The effect of moving to a new hospital facility on the prevalence of methicillin-resistant *Staphylococcus aureus*. *Am J Infect Control*. 2004 Aug;32(5):262–7.
76. Walsh WF, McCullough KL, White RD. Room for improvement: nurses' perceptions of providing care in a single room newborn intensive care setting. *Adv Neonatal Care Off J Natl Assoc Neonatal Nurses*. 2006 Oct;6(5):261–70.
77. Bevan V, Edwards C, Woodhouse K, Singh I. Dignified care for older people: Mixed methods evaluation of the impact of the hospital environment - single rooms or multi-bedded wards: *Healthy Aging Res*. 2016;5(13):1–8.
78. Bocquet A, Wintenberger C, Lupo J, Morand P, Pavese P, Gallouche M, et al. Description of an influenza outbreak in a French university hospital and risk factors of nosocomial influenza. *Eur J Clin Microbiol Infect Dis*. 2021 Apr;40(4):879–84.
79. Cobo J, Asensio Á, Moreno S, Navas E, Pintado V, Oliva J, et al. Risk factors for nosocomial transmission of multidrug-resistant tuberculosis due to *Mycobacterium bovis* among HIV-infected patients. :6.
80. Everts RJ, Hanger HC, Jennings LC, Hawkins A, Sainsbury R. Outbreaks of influenza A among elderly hospital inpatients. *N Z Med J*. 1996 Jul 26;109(1026):272–4.
81. Ford-Jones EL, Mindorff CM, Gold R, Petric M. THE INCIDENCE OF VIRAL-ASSOCIATED DIARRHEA AFTER ADMISSION TO A PEDIATRIC HOSPITAL. *Am J Epidemiol*. 1990 Apr;131(4):711–8.
82. Fraenkel Cj, Inghammar M, Söderlund-Strand A, Johansson PJH, Böttiger B. Risk factors for hospital norovirus outbreaks: impact of vomiting, genotype, and multi-occupancy rooms. *J Hosp Infect*. 2018 Apr;98(4):398–403.
83. Jou J, Ebrahim J, Shofer FS, Hamilton KW, Stern J, Han JH. Environmental Transmission of *Clostridium difficile*: Association Between Hospital Room Size and *C. difficile* Infection. *Infect Control Hosp Epidemiol*. 2015 May;36(5):564–8.
84. Lorenz SG, Dreher HM. Hospital Room Design and Health Outcomes of the Aging Adult. *PA P E R S*. 2011;4(2):14.
85. Mattner F, Rüden AS, Mattner L, Chaberny IF, Ziesing S, Strueber M, et al. Thoracic organ transplantation may not increase the risk of bacterial transmission in intensive care units. *Int J Hyg Environ Health*. 2007 Mar;210(2):139–45.

86. Morgan H. Single and shared accommodation for young patients in hospital: Helen Morgan considers the importance of designing hospital units that ensure patient safety and security without limiting the opportunity for socialisation. *Paediatr Care*. 2010 Sep 28;22(8):20–4.
87. Munier-Marion E, Bénet T, Régis C, Lina B, Morfin F, Vanhems P. Hospitalization in double-occupancy rooms and the risk of hospital-acquired influenza: a prospective cohort study. *Clin Microbiol Infect*. 2016 May;22(5):461.e7–461.e9.
88. Park SH, Stockbridge EL, Miller TL, O’Neill L. Private patient rooms and hospital-acquired methicillin-resistant *Staphylococcus aureus*: A hospital-level analysis of administrative data from the United States. Klein EY, editor. *PLOS ONE*. 2020 Jul 9;15(7):e0235754.
89. Pilmis B, Billard-Pomares T, Martin M, Clarempuy C, Lemezo C, Saint-Marc C, et al. Can environmental contamination be explained by particular traits associated with patients? *J Hosp Infect*. 2020 Mar;104(3):293–7.
90. Quach C, Shah R, Rubin LG. Burden of Healthcare-Associated Viral Respiratory Infections in Children’s Hospitals. *J Pediatr Infect Dis Soc*. 2018 Feb 19;7(1):18–24.
91. Sadatsafavi H, Niknejad B, Zadeh R, Sadatsafavi M. Do cost savings from reductions in nosocomial infections justify additional costs of single-bed rooms in intensive care units? A simulation case study. *J Crit Care*. 2016 Feb;31(1):194–200.
92. Stiller A, Schröder C, Gropmann A, Schwab F, Behnke M, Geffers C, et al. ICU ward design and nosocomial infection rates: a cross-sectional study in Germany. *J Hosp Infect*. 2017 Jan;95(1):71–5.
93. Vaisman A, Jula M, Wagner J, Winston LG. Examining the association between hospital-onset *Clostridium difficile* infection and multiple-bed room exposure: a case-control study. *Infect Control Hosp Epidemiol*. 2018 Sep;39(9):1068–73.
94. Washam MC, Ankrum A, Haberman BE, Staat MA, Haslam DB. Risk Factors for *Staphylococcus aureus* Acquisition in the Neonatal Intensive Care Unit: A Matched Case-Case-Control Study. *Infect Control Hosp Epidemiol*. 2018 Jan;39(1):46–52.
95. O’Neill L, Park SH, Rosinia F. The role of the built environment and private rooms for reducing central line-associated bloodstream infections. Kamolz LP, editor. *PLOS ONE*. 2018 Jul 27;13(7):e0201002.
96. Kinnula SE, Renko M, Tapiainen T, Knuutinen M, Uhari M. Hospital-associated infections during and after care in a paediatric infectious disease ward. *J Hosp Infect*. 2008 Apr;68(4):334–40.
97. Kinnula S, Buettcher M, Tapiainen T, Renko M, Vepsäläinen K, Lantto R, et al. Hospital-associated infections in children: a prospective post-discharge follow-up survey in three different paediatric hospitals. *J Hosp Infect*. 2012 Jan;80(1):17–24.
98. Liu LX, Mozafarinia M, Axelin A, Feeley N. Parents’ Experiences of Support in NICU Single-Family Rooms. *Neonatal Netw NN*. 2019 Mar 1;38(2):88–97.
99. Reid J, Wilson K, Anderson KE, Maguire CPJ. Older inpatients’ room preference: single versus shared accommodation. *Age Ageing*. 2015 Mar;44(2):331–3.

100. Poncette AS, Wunderlich MM, Spies C, Heeren P, Vorderwülbecke G, Salgado E, et al. Patient Monitoring Alarms in an Intensive Care Unit: Observational Study With Do-It-Yourself Instructions. *J Med Internet Res*. 2021 May 28;23(5):e26494.
101. Janssen PA, Dennis CL, Reime B. Development and psychometric testing of The Care in Obstetrics: Measure for Testing Satisfaction (COMFORTS) scale. *Res Nurs Health*. 2006 Feb;29(1):51–60.
102. Anåker A. “It’s Lonely”: Patients’ Experiences of the Physical Environment at a Newly Built Stroke Unit. *Des J*. :12.
103. Carlson B, Walsh S, Wergin T, Schwarzkopf K, Ecklund S. Challenges in design and transition to a private room model in the neonatal intensive care unit. *Adv Neonatal Care Off J Natl Assoc Neonatal Nurses*. 2006 Oct;6(5):271–80.
104. Curtis P, Northcott A. The impact of single and shared rooms on family-centred care in children’s hospitals. *J Clin Nurs*. 2017 Jun;26(11–12):1584–96.
105. Florey L, Flynn R, Isles C. Patient Preferences for Single Rooms or Shared Accommodation in a District General Hospital. *Scott Med J*. 2009 May;54(2):5–8.
106. Jones L, Peters K, Rowe J, Sheeran N. The Influence of Neonatal Nursery Design on Mothers’ Interactions in the Nursery. *J Pediatr Nurs*. 2016 Oct;31(5):e301-312.
107. Milford C, Zapalo B, Davis G. Transition to an Individual-Room NICU Design: Process and Outcome Measures. *Neonatal Netw*. 2008 Sep;27(5):299–305.
108. Real K, Fay L. Using Systems Theory to Examine Patient and Nurse Structures, Processes, and Outcomes in Centralized and Decentralized Units. :16.
109. Roos AKØ, Skaug EA, Grøndahl VA, Helgesen AK. Trading company for privacy: A study of patients’ experiences. *Nurs Ethics*. 2020 Jun;27(4):1089–102.
110. Apple M. A Comparative Evaluation of Swedish Intensive Care Patient Rooms. *HERD Health Environ Res Des J*. 2014 Apr;7(3):78–93.
111. Boztepe H, Çınar S, Ay A. School-age children’s perception of the hospital experience. *J Child Health Care*. 2017 Jun;21(2):162–70.
112. Deitrick LM, Bokovoy J, Panik A. The “Dance” Continues ... Evaluating Differences in Call Bell Use Between Patients in Private Rooms and Patients in Double Rooms Using Ethnography. *J Nurs Care Qual*. 2010 Oct;25(4):279–87.
113. Douglas CH, Douglas MR. Patient-centred improvements in health-care built environments: perspectives and design indicators. *Health Expect*. 2005 Sep;8(3):264–76.
114. Hosseini SB, Bagheri M. Comparison of Patient Satisfaction with Single Patient Rooms Versus Shared Patient Rooms. *Ann Mil Health Sci Res [Internet]*. 2018 Jul 8 [cited 2022 Jul 20];15(4). Available from: <https://brief.land/amhsr/articles/80199.html>
115. Malcolm HA. Does privacy matter? Former patients discuss their perceptions of privacy in shared hospital rooms. *Nurs Ethics*. 2005 Mar;12(2):156–66.

116. Nash P, Vanhoof J, Hall S, Arulmani U, Tarzynski-Potempa R, Unnebrink K, et al. Randomized Crossover Comparison of Injection Site Pain with 40 mg/0.4 or 0.8 mL Formulations of Adalimumab in Patients with Rheumatoid Arthritis. *Rheumatol Ther*. 2016 Dec;3(2):257–70.
117. Persson E, Määttä S. To provide care and be cared for in a multiple-bed hospital room: *Care in a multiple-bed hospital room*. *Scand J Caring Sci*. 2012 Dec;26(4):663–70.
118. Persson E, Anderberg P, Kristensson Ekwall A. A room of one's own - Being cared for in a hospital with a single-bed room design. *Scand J Caring Sci*. 2015 Jun;29(2):340–6.
119. Rowlands J, Noble S. How does the environment impact on the quality of life of advanced cancer patients? A qualitative study with implications for ward design. *Palliat Med*. 2008 Sep;22(6):768–74.
120. Schalkers I, Dedding CWM, Bunders JFG. '[I would like] a place to be alone, other than the toilet' - Children's perspectives on paediatric hospital care in the Netherlands. *Health Expect*. 2015 Dec;18(6):2066–78.
121. Bradbury-Jones C, Rattray J, Jones M, MacGillivray S. Promoting the health, safety and welfare of adults with learning disabilities in acute care settings: a structured literature review. *J Clin Nurs*. 2013;22(11–12):1497–509.
122. Mental Welfare Commission for Scotland. *Psychiatr Bull*. 1991 Apr;15(4):254–5.
123. Anåker A, von Koch L, Sjöstrand C, Bernhardt J, Elf M. A comparative study of patients' activities and interactions in a stroke unit before and after reconstruction—The significance of the built environment. Martinuzzi A, editor. *PLOS ONE*. 2017 Jul 20;12(7):e0177477.
124. Cusack L, Wiechula R, Schultz T, Dollard J, Maben J. Anticipated advantages and disadvantages of a move to 100% single-room hospital in Australia: A case study. *J Nurs Manag*. 2019 Jul;27(5):963–70.
125. Kainiemi E, Hongisto P, Lehtonen L, Pape B, Axelin A. Effects of single family room architecture on parent–infant closeness and family centered care in neonatal environments—a single-center pre–post study. *J Perinatol*. 2021 Sep;41(9):2244–51.
126. Rosbergen ICM, Tonello I, Clark RA, Grimley RS. Does hospital design impact on patient activity levels and time spent alone? *Disabil Rehabil*. 2022 Jun 19;44(13):3173–80.
127. Darcy Mahoney A, White RD, Velasquez A, Barrett TS, Clark RH, Ahmad KA. Impact of restrictions on parental presence in neonatal intensive care units related to coronavirus disease 2019. *J Perinatol*. 2020 Sep;40(S1):36–46.
128. de Matos LBN, Fumis RRL, Nassar Junior AP, Lacerda FH, Caruso P. Single-Bed or Multibed Room Designs Influence ICU Staff Stress and Family Satisfaction, But Do Not Influence ICU Staff Burnout. *HERD*. 2020 Apr;13(2):234–42.
129. Pease NJ, Finlay IG. Do patients and their relatives prefer single cubicles or shared wards? *Palliat Med*. 2002 Jul;16(5):445–6.
130. Tandberg BS, Frøslie KF, Flacking R, Grundt H, Lehtonen L, Moen A. Parent-Infant Closeness, Parents' Participation, and Nursing Support in Single-Family Room and Open Bay NICUs. *J Perinat Neonatal Nurs*. 2018 Dec;32(4):E22–32.

131. Taylor E, Card AJ, Piatkowski M. Single-Occupancy Patient Rooms: A Systematic Review of the Literature Since 2006. *HERD Health Environ Res Des J*. 2018 Jan;11(1):85–100.
132. Chaudhury H, Mahmood A, Valente M. The use of single patient rooms versus multiple occupancy rooms in acute care environments [Internet]. 2004 [cited 2022 Jul 21]. Available from: [https://www.healthdesign.org/sites/default/files/use\\_of\\_single\\_patient\\_rooms\\_v\\_multiple\\_occ\\_rooms-acute\\_care.pdf](https://www.healthdesign.org/sites/default/files/use_of_single_patient_rooms_v_multiple_occ_rooms-acute_care.pdf)
133. Maben J, Griffiths P, Penfold C, Simon M, Pizzo E, Anderson J, et al. Evaluating a major innovation in hospital design: workforce implications and impact on patient and staff experiences of all single room hospital accommodation [Internet]. Southampton (UK): NIHR Journals Library; 2015 [cited 2022 Jul 21]. (Health Services and Delivery Research). Available from: <http://www.ncbi.nlm.nih.gov/books/NBK274434/>
134. Pyrke RJL, McKinnon MC, McNeely HE, Ahern C, Langstaff KL, Bieling PJ. Evidence-Based Design Features Improve Sleep Quality Among Psychiatric Inpatients. *HERD Health Environ Res Des J*. 2017 Oct;10(5):52–63.
135. Van Enk RA, Steinberg F. Comparison of Private Room with Multiple-Bed Ward Neonatal Intensive Care Unit Environments. *HERD Health Environ Res Des J*. 2011 Oct;5(1):52–63.
136. Eberhard-Gran M, Eskild A, Opjordsmoen S, Schei B. Maternity care - sleep, rest and satisfaction. :10.
137. Edéll-Gustafsson U, Angelhoff C, Johnsson E, Karlsson J, Mörelius E. Hindering and buffering factors for parental sleep in neonatal care. A phenomenographic study. *J Clin Nurs*. 2015 Mar;24(5–6):717–27.
138. Foo CT, O’Driscoll DM, Ogeil RP, Lubman D, Young AC. Barriers to sleep in acute hospital settings. *Sleep Breath*. 2022 Jun;26(2):855–63.
139. Meyer TJ, Eveloff SE, Bauer MS, Schwartz WA, Hill NS, Millman RP. Adverse Environmental Conditions in the Respiratory and Medical ICU Settings. *Chest*. 1994 Apr;105(4):1211–6.
140. Sakr N, Hallit S, Mattar H. Incidence of and Factors Associated with New-Onset Insomnia Among Lebanese Hospitalised Patients: A single-centre study. *Sultan Qaboos Univ Med J SQUMJ*. 2021 Jun 21;21(2):e210-220.
141. Tegnestedt C, Günther A, Reichard A, Bjurström R, Alvarsson J, Martling CR, et al. Levels and sources of sound in the intensive care unit - an observational study of three room types: Levels and sources of sound in a multidisciplinary ICU. *Acta Anaesthesiol Scand*. 2013 Sep;57(8):1041–50.
142. Stevens DC, Helseth CC, Khan MA, Munson DP, Reid EJ. A Comparison of Parent Satisfaction in an Open-Bay and Single-Family Room Neonatal Intensive Care Unit. *HERD Health Environ Res Des J*. 2011 Apr;4(3):110–23.
143. Labarère J, Fourny M, Jean-Phillippe V, Marin-Pache S, Patrice F. Refinement and validation of a French in-patient experience questionnaire. *Int J Health Care Qual Assur*. 2004 Jan 1;17(1):17–25.

144. Miller NO, Friedman SB, Coupey SM. Adolescent preferences for rooming during hospitalization. *J Adolesc Health*. 1998 Aug;23(2):89–93.
145. Watson J, DeLand M, Gibbins S, MacMillan York E, Robson K. Improvements in Staff Quality of Work Life and Family Satisfaction Following the Move to Single-Family Room NICU Design. *Adv Neonatal Care*. 2014 Apr;14(2):129–36.
146. Boardman AE, Forbes D. A Benefit-Cost Analysis of Private and Semi-Private Hospital Rooms. *J Benefit-Cost Anal*. 2011 Jan 3;2(1):1–27.
147. Ruka K, Kenichi K, Juno K. Study on the effect of private rooms in wards on bed management COMPASRtAuTdlyVEonSTthUeDieEfSfeOcNt oHfOpSriPvlaTtAeLr-BoEoDmMs AinNwAGaErdMsEoNnT bBeEdTWmEaEnNagement. :9.
148. Stevens DC, Thompson PA, Helseth CC, Hsu B, Khan MA, Munson DP. A comparison of the direct cost of care in an open-bay and single-family room NICU. *J Perinatol*. 2014 Nov;34(11):830–5.
149. Blandfort S, Gregersen M, Rahbek K, Juul S, Damsgaard EM. Analgesic and psychoactive medications and the risk of falls in relation to delirium in single-bed rooms compared to multiple-bed rooms in geriatric inpatients. *Aging Clin Exp Res*. 2020 Aug;32(8):1493–9.
150. Reed G, Schmid M. Nursing Implementation of Single-Room Maternity Care. *J Obstet Gynecol Neonatal Nurs*. 1986 Sep;15(5):386–9.

## FIGURE LEGENDS

**Figure 1. Selection of papers for review**

**Figure 2. Percentage of studies reporting data in favour of either single-room or shared-room design, according to the type of data available and outcome reported**

**Figure 3. Clinical outcomes represented by the total sample size with data for that outcome, by level of care and the type of data reported and room design favoured**

**Figure 4. Patient-experience outcomes represented by the total sample size with data for that outcome, by level of care and the type of data reported and room design favoured**

**Figure 5. Economic outcomes represented by the total sample size with data for that outcome, by level of care and the type of data reported and room design favoured**

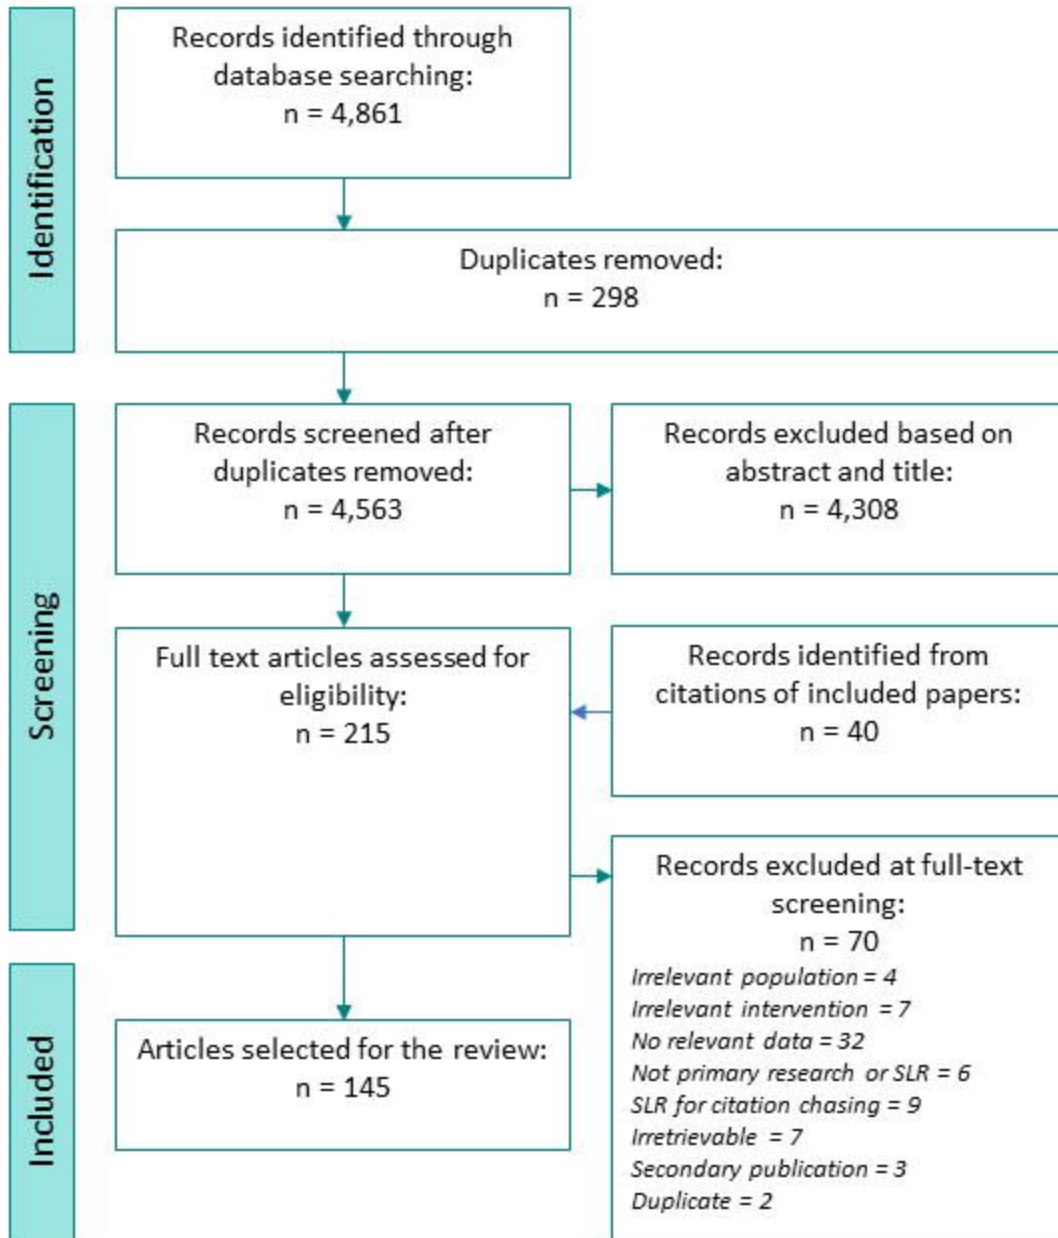



■ Data favours single-room design  
■ Data favours neither  
■ Data favours shared-room design

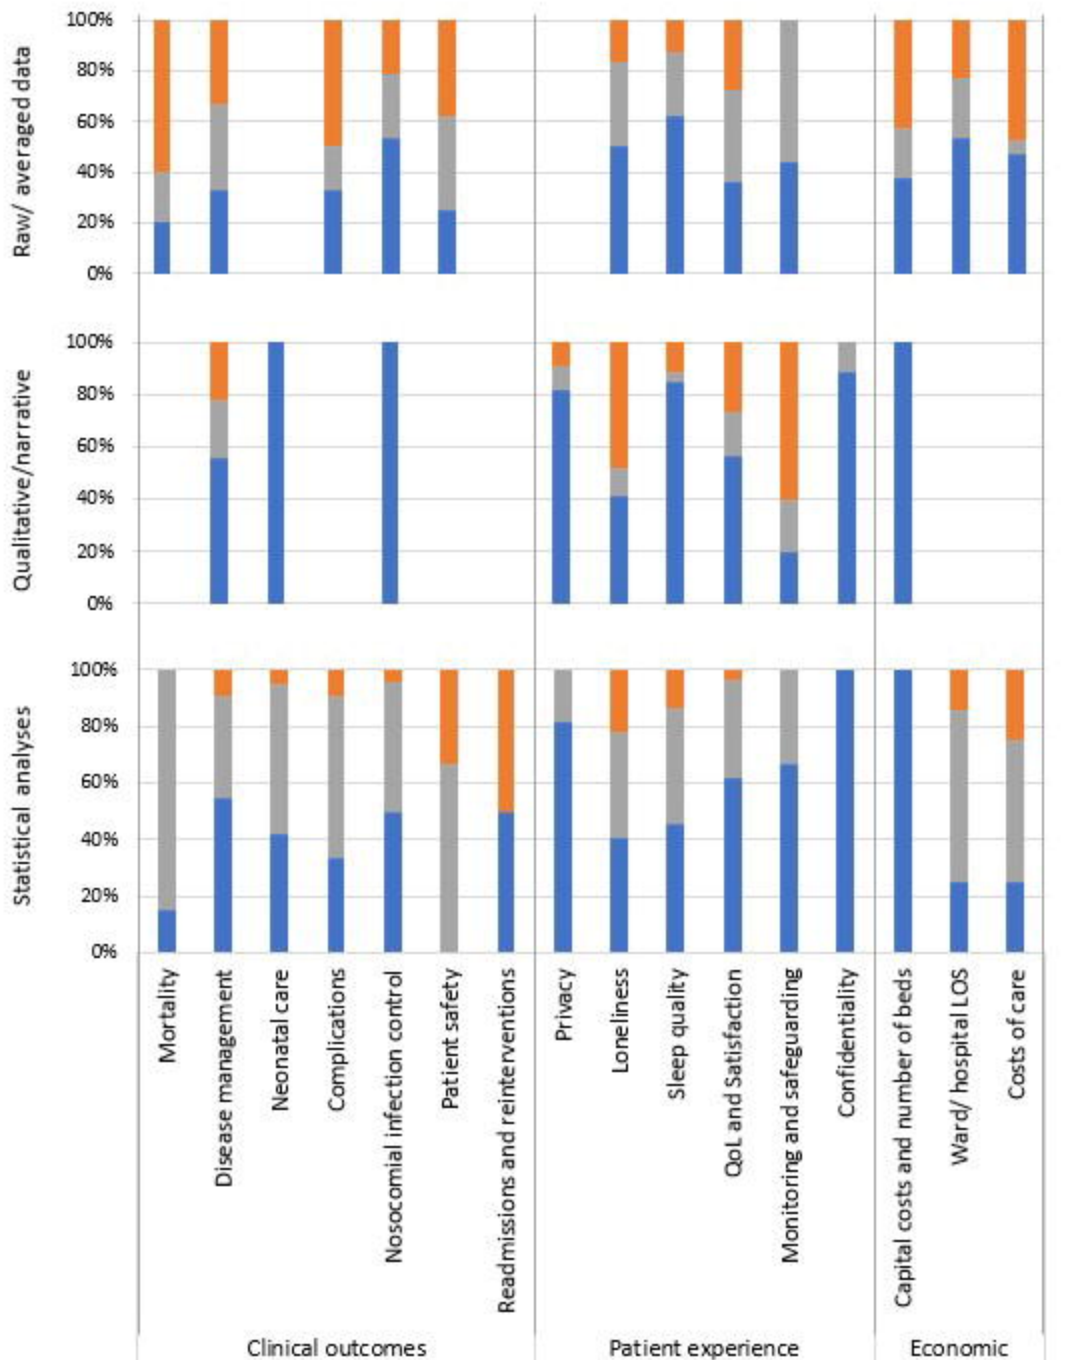

| Outcome                          | Level Of Care     | Statistical analyses |                |        | Qualitative |         |        | Raw/averaged data |         |                |
|----------------------------------|-------------------|----------------------|----------------|--------|-------------|---------|--------|-------------------|---------|----------------|
|                                  |                   | Single               | Neither        | Shared | Single      | Neither | Shared | Single            | Neither | Shared         |
| Mortality                        | Adult ICU         | ■                    | ■              |        |             |         |        |                   |         | ■              |
|                                  | Adult routine     |                      | ■              |        |             |         |        |                   | ●       |                |
|                                  | Pediatric ICU     | ■                    | ■ <sup>a</sup> |        |             |         |        | ●                 |         | ■ <sup>a</sup> |
| Disease management               | Adult routine     | ●                    | ●              |        | ■           |         | ●      | ■                 | ●       |                |
|                                  | Maternity         | ■                    | ■              |        |             |         |        |                   |         |                |
|                                  | Mixed/unclear     |                      |                |        |             |         |        |                   |         | ●              |
|                                  | Pediatric ICU     | ■                    | ■              | ●      | ■           | ●       | ●      |                   |         | ●              |
| Neonatal care                    | Adult routine     | ●                    |                |        |             |         |        |                   |         |                |
|                                  | Mixed/unclear     | ●                    |                |        |             |         |        |                   |         |                |
|                                  | Pediatric ICU     | ■ <sup>a</sup>       | ■              | ●      | ●           |         |        |                   |         |                |
| Complications                    | Adult routine     | ■                    | ■              | ■      |             |         |        | ●                 |         | ●              |
|                                  | Maternity         |                      |                |        |             |         |        |                   | ■       |                |
|                                  | Pediatric ICU     | ■                    | ■              | ■      |             |         |        | ■                 |         | ●              |
| Nosocomial infection control     | Adult ICU         | ■                    | ●              |        | ●           |         |        | ■ <sup>b</sup>    |         | ■ <sup>b</sup> |
|                                  | Adult routine     | ■                    | ■              |        |             |         |        | ●                 | ●       |                |
|                                  | Maternity         |                      | ●              |        |             |         |        |                   |         |                |
|                                  | Mixed/unclear     | ■ <sup>\$</sup>      |                | ●      |             |         |        | ■                 |         | ●              |
|                                  | Pediatric ICU     | ■ <sup>b</sup>       | ■ <sup>a</sup> | ■      | ●           |         |        | ■                 | ■       | ■              |
|                                  | Pediatric routine | ■                    | ■              |        |             |         |        | ■                 | ■       |                |
| Patient safety                   | Adult ICU         |                      |                |        |             |         |        |                   |         | ●              |
|                                  | Adult routine     |                      | ■              | ■      |             |         |        | ■                 | ●       |                |
|                                  | Mixed/unclear     |                      |                |        |             |         |        |                   |         | ●              |
| Readmissions and reinterventions | Adult ICU         |                      |                | ●      |             |         |        |                   |         |                |
|                                  | Pediatric ICU     | ●                    |                |        |             |         |        |                   |         |                |

**Total sample size\*:**

a > 10,000 participants  
b > 15,000 participants  
\$ > 3 million participants  
\*Not all studies reported sample size

**Room favoured:**

- Single-rooms
- Neither/equivocal
- Shared-rooms

| Outcome                     | Level Of Care     | Statistical analyses |         |        | Qualitative |         |        | Raw/averaged data |         |        |
|-----------------------------|-------------------|----------------------|---------|--------|-------------|---------|--------|-------------------|---------|--------|
|                             |                   | Single               | Neither | Shared | Single      | Neither | Shared | Single            | Neither | Shared |
| Confidentiality             | Adult ICU         |                      |         |        | .           |         |        |                   |         |        |
|                             | Adult routine     | ■                    |         |        | .           |         |        |                   |         |        |
|                             | Maternity         |                      |         |        | .           |         |        |                   |         |        |
|                             | Mixed/unclear     |                      |         |        | .           | •       |        |                   |         |        |
|                             | Pediatric ICU     |                      |         |        | .           |         |        |                   |         |        |
| Loneliness                  | Adult ICU         |                      |         | •      | .           |         | .      |                   |         |        |
|                             | Adult routine     | ■                    | ■       | ■      | ■           |         | ■      |                   |         | •      |
|                             | Maternity         |                      | ■       | •      | .           | ■       | .      |                   |         |        |
|                             | Mixed/unclear     |                      |         |        |             | .       | .      |                   |         |        |
|                             | Pediatric ICU     | ■                    | ■       | •      | ■           | .       | ■      |                   |         |        |
| Monitoring and safeguarding | Adult routine     | ■                    | .       |        | .           |         | ■      | ■                 |         |        |
|                             | Mixed/unclear     |                      |         |        |             | .       |        |                   |         | ■      |
|                             | Pediatric ICU     |                      |         |        |             |         |        |                   |         | ■      |
| Privacy                     | Adult ICU         |                      |         |        | .           |         |        |                   |         |        |
|                             | Adult routine     | ■                    |         |        | ■           | ■       | .      |                   |         |        |
|                             | Maternity         | ■                    |         |        | ■           |         | .      |                   |         |        |
|                             | Mixed/unclear     |                      |         |        | .           |         |        |                   |         |        |
|                             | Pediatric ICU     | ■                    | .       |        | .           |         | .      |                   |         |        |
|                             | Pediatric routine |                      |         |        | ■           |         | ■      |                   |         |        |
| QoL and Satisfaction        | Adult ICU         | ■                    | ■       |        |             |         |        |                   |         |        |
|                             | Adult routine     | ■                    | ■       |        | ■           | .       | ■      |                   | .       | .      |
|                             | Maternity         | ■                    |         |        | ■           | .       | ■      |                   | .       | .      |
|                             | Mixed/unclear     | ■                    |         |        | .           |         | .      | ■                 |         |        |
|                             | Pediatric ICU     | ■                    | ■       | .      | .           |         |        | .                 | .       | .      |
|                             | Pediatric routine |                      |         |        |             |         |        |                   | .       | ■      |
| Sleep quality               | Adult ICU         |                      | .       | •      | .           |         |        |                   |         | .      |
|                             | Adult routine     | ■                    | .       | •      | ■           |         | .      | ■                 |         |        |
|                             | Maternity         | ■                    | ■       |        | ■           |         |        |                   |         |        |
|                             | Mixed/unclear     |                      |         |        | ■           |         |        |                   |         |        |
|                             | Pediatric ICU     | ■                    | .       | .      | ■           |         | .      | ■                 | .       |        |
|                             | Pediatric routine |                      |         |        | ■           |         |        |                   |         |        |

**Total sample size\*:**

a > 10,000 participants  
b > 15,000 participants  
\$ > 3 million participants  
\*Not all studies reported sample size

**Room favoured:**

- Single-rooms
- Neither/equivocal
- Shared-rooms

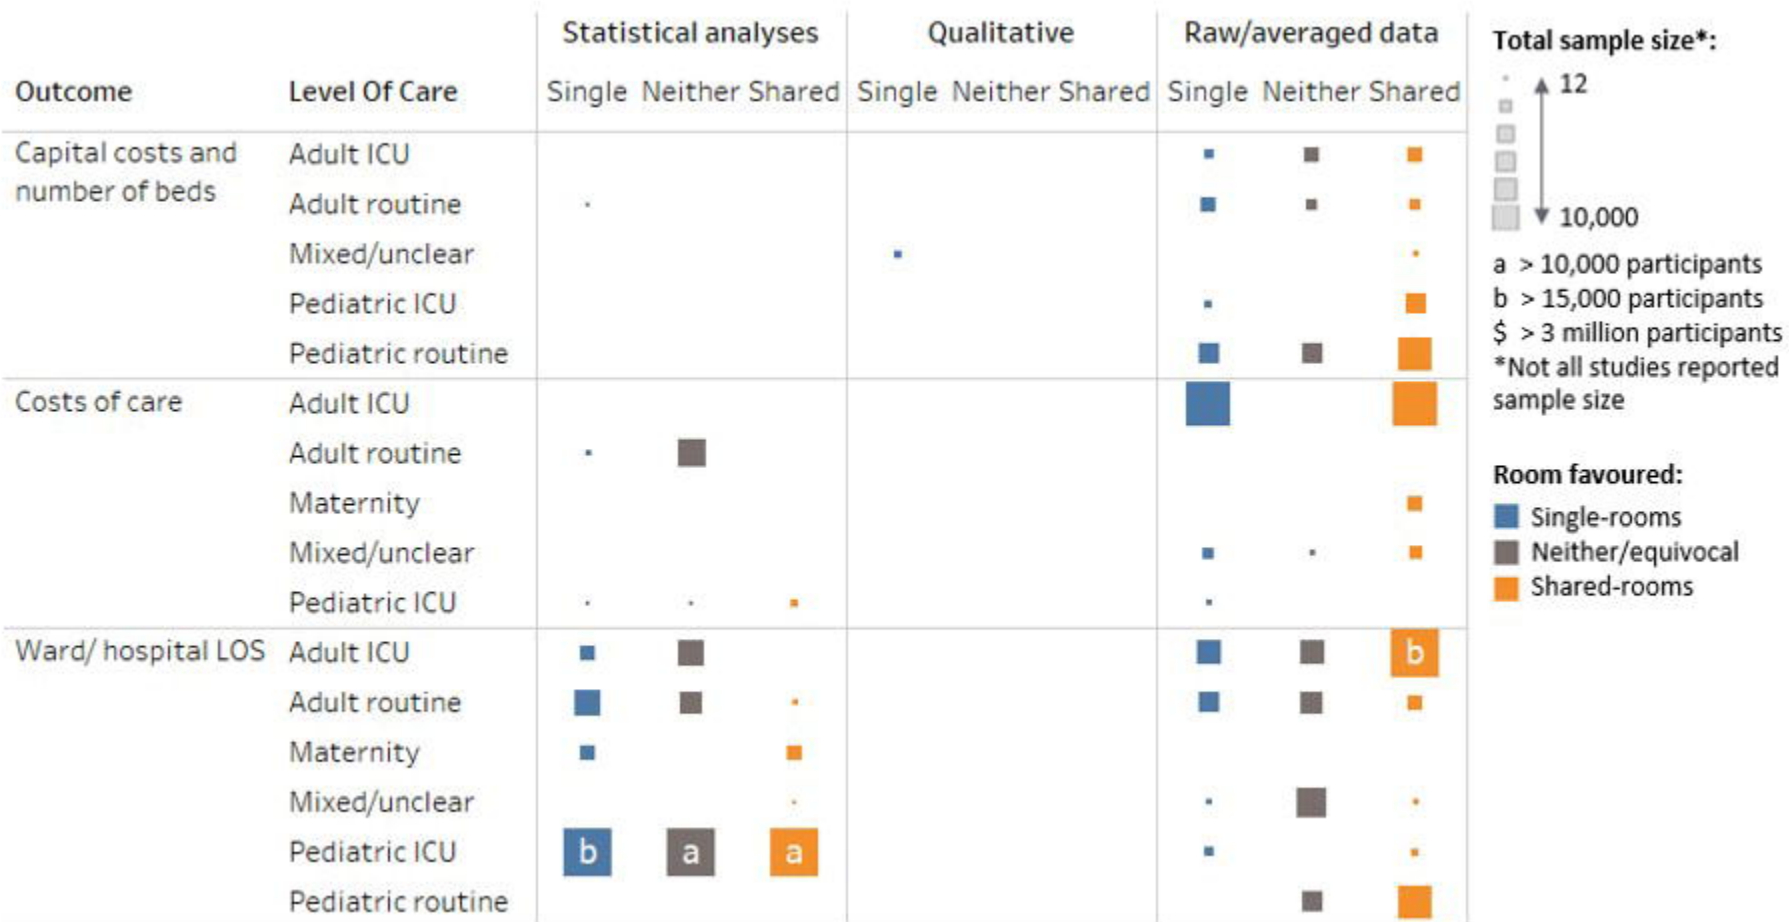

Source: https://medrxiv.org/content/10.1101/2022.09.27.22280411v1.full.pdf
